# Supplementary material for: Gradual spin crossover behavior encompasing room temperature in an iron(ii) complex based on a heteroscorpionate ligand
Source: Royal Society of Chemistry journal article supplement (doi:10.1039/d4dt02244k), 2024-01-01

**Gradual spin crossover behavior encompassing room temperature in an Iron(II) complex  
based on heteroscorpionate ligand**

Oleksandr Ye. Horniichuk, Laure Vendier, Lionel Salmon,\* Azzedine Bousseksou\*

*LCC, CNRS and Université de Toulouse (UPS, INP) 205 route de Narbonne, F-31077  
Toulouse, France.*

Figure S1: Crystal structure of the product formed in an attempt of reduction of  $n\text{Bu}_4\text{NL}^1$ . Hydrogen atoms are omitted for clarity. Displacement ellipsoids are drawn at 50% probability level.

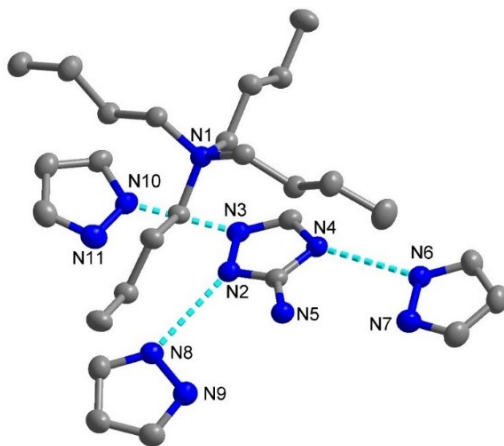

Figure S2:  $^1\text{H}$  NMR spectrum (aromatic region) of product obtained in an attempt to reduce  $n\text{Bu}_4\text{NL}^1$  (solvent –  $\text{CD}_3\text{OD}$ ).

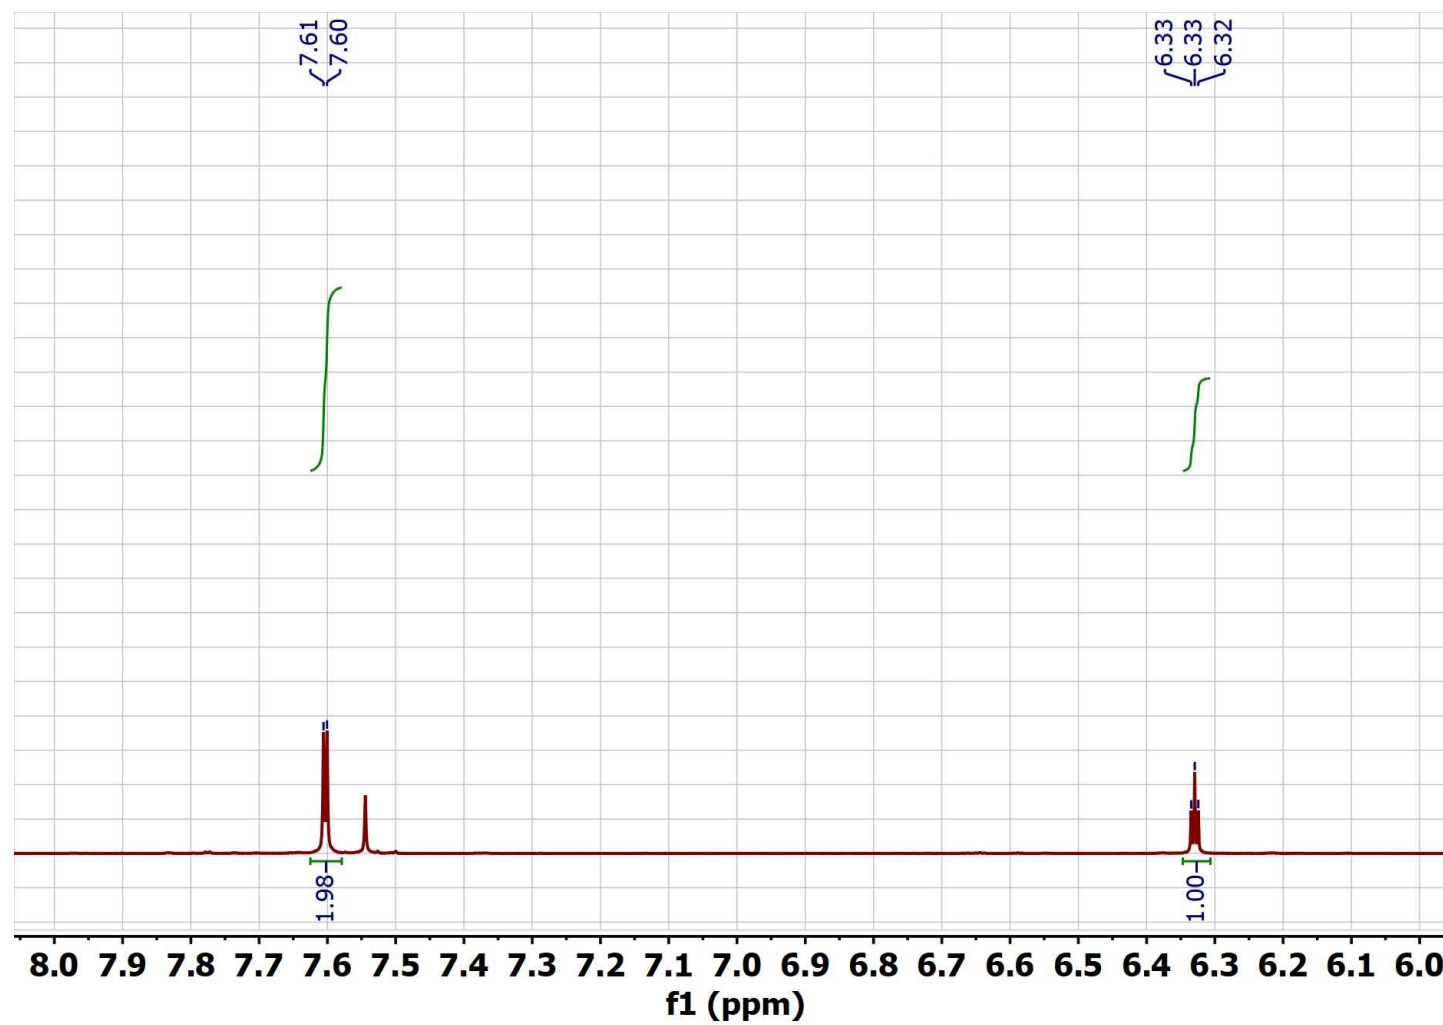

Figure S3:  $^1\text{H}$  NMR spectrum (aromatic region) of  ${}^n\text{Bu}_4\text{NL}^1$  in  $\text{CD}_2\text{Cl}_2$ .

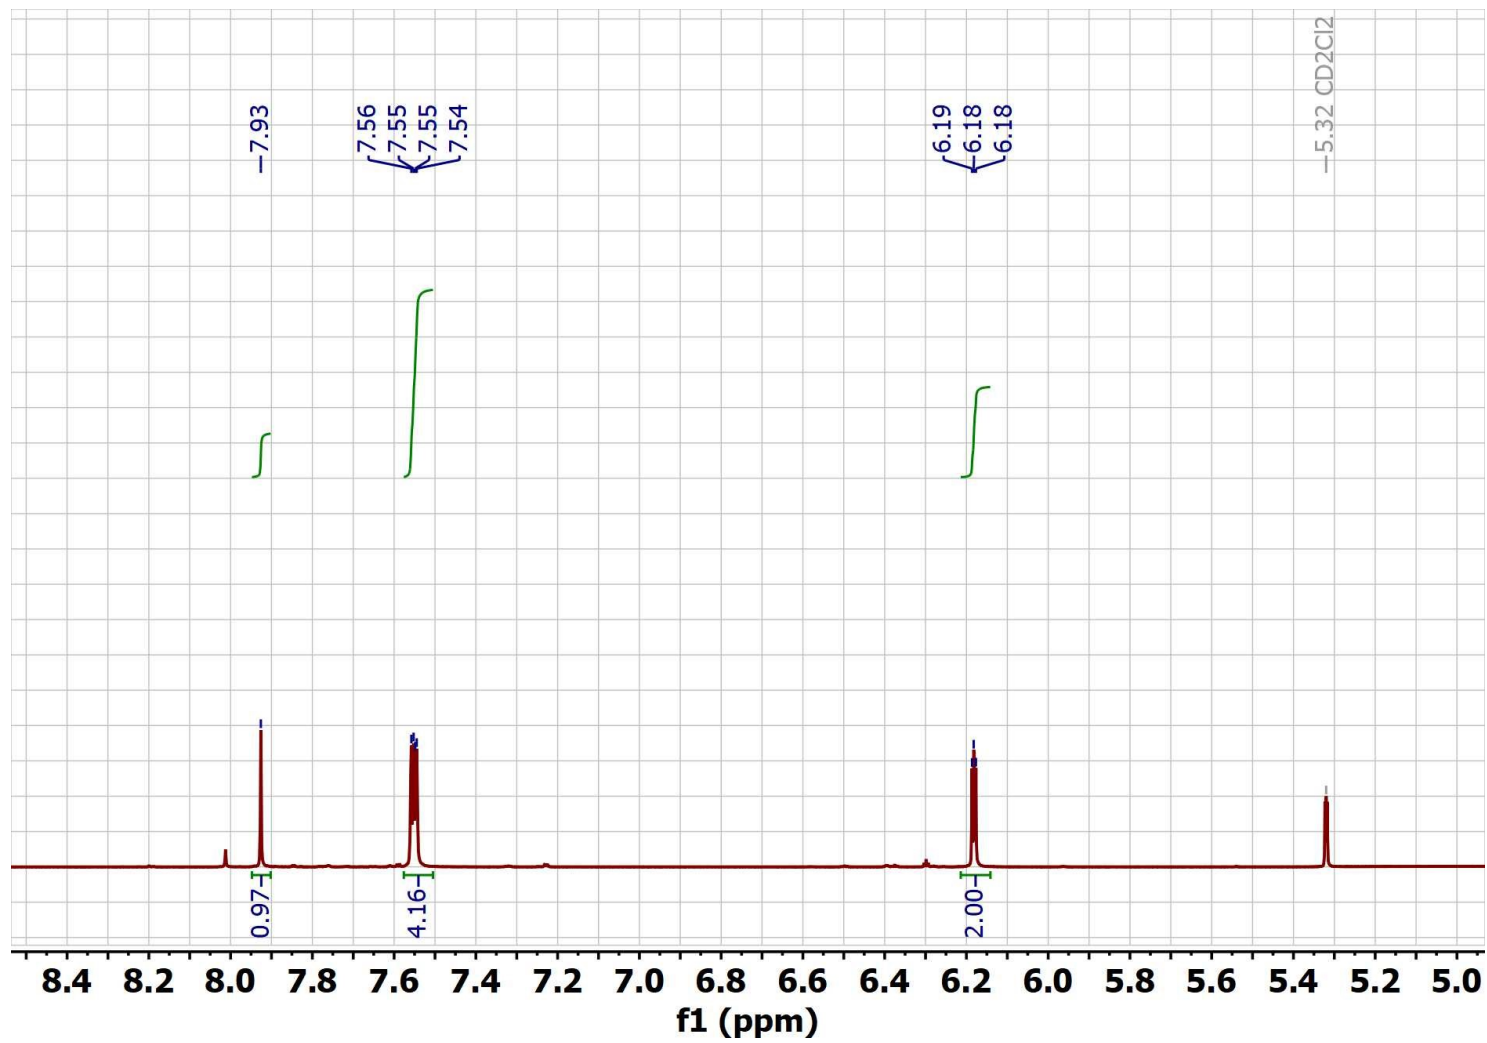

Figure S4:  $^{13}\text{C}$  NMR spectrum (aromatic region) of  $^n\text{Bu}_4\text{NL}^1$  in  $\text{CD}_2\text{Cl}_2$ .

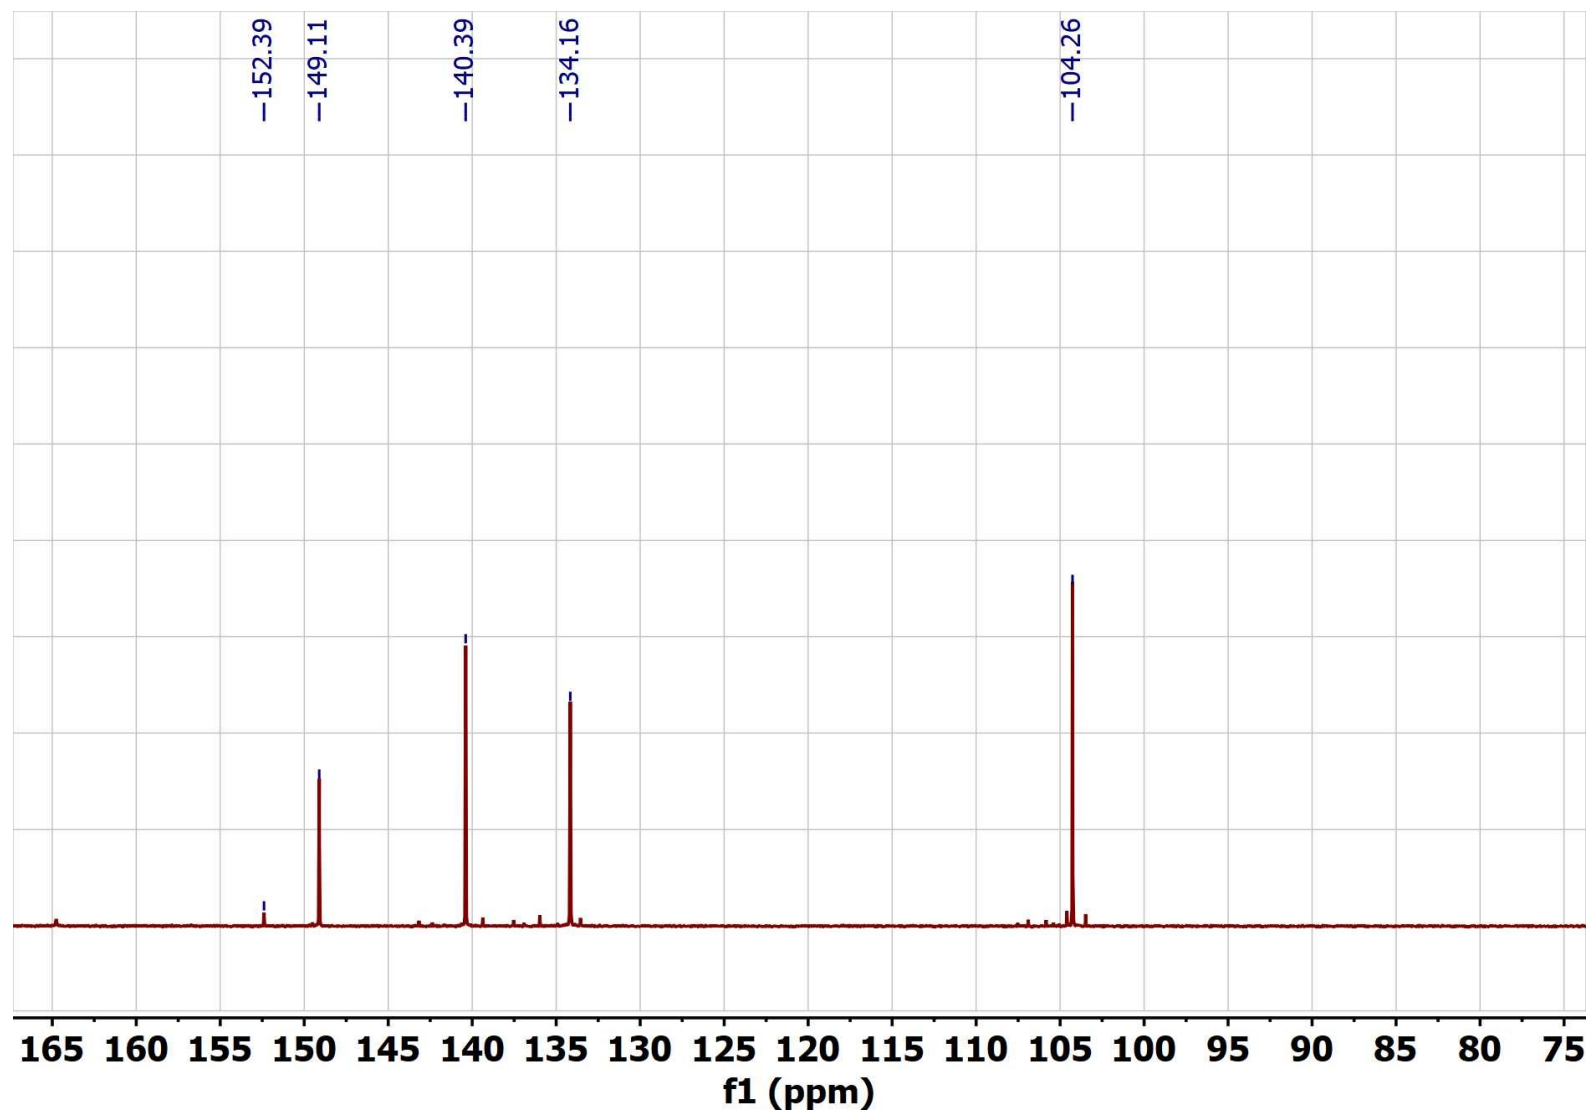

Figure S5:  $^{11}\text{B}$  NMR spectrum of  $n\text{Bu}_4\text{NL}^1$  in  $\text{CD}_2\text{Cl}_2$ .

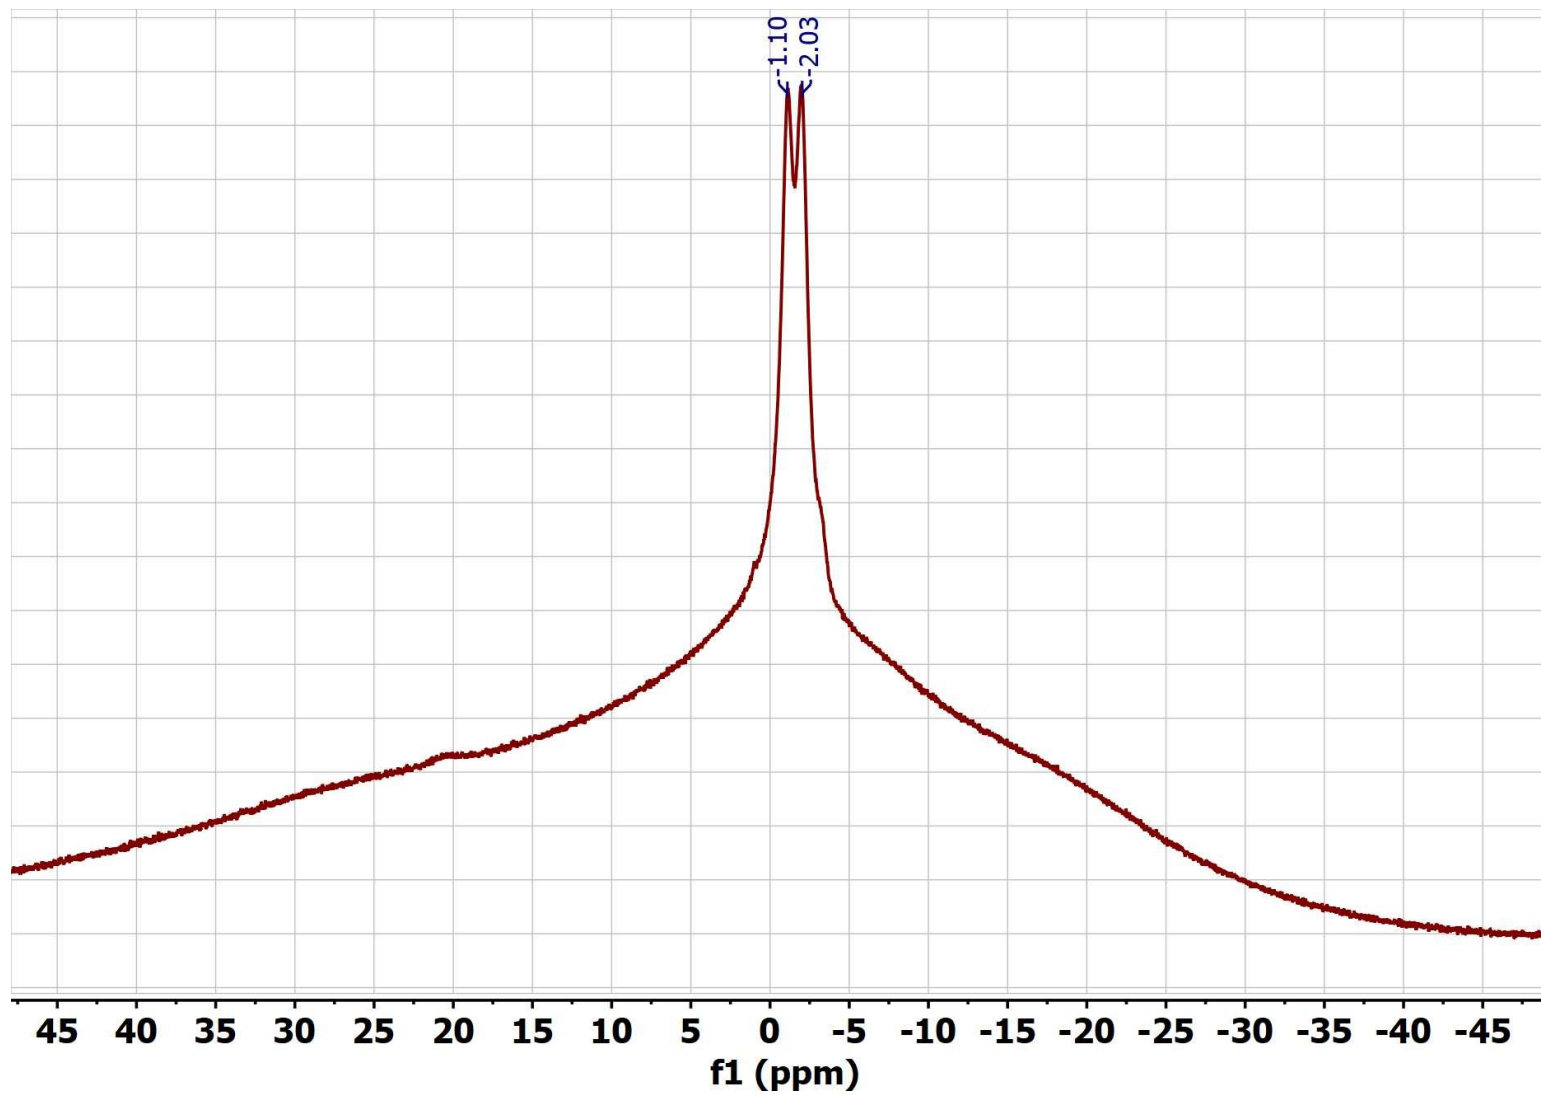

Figure S6:  $^1\text{H}$  NMR spectrum (aromatic region) of  ${}^n\text{Bu}_4\text{NL}^2$  in  $\text{CD}_2\text{Cl}_2$ .

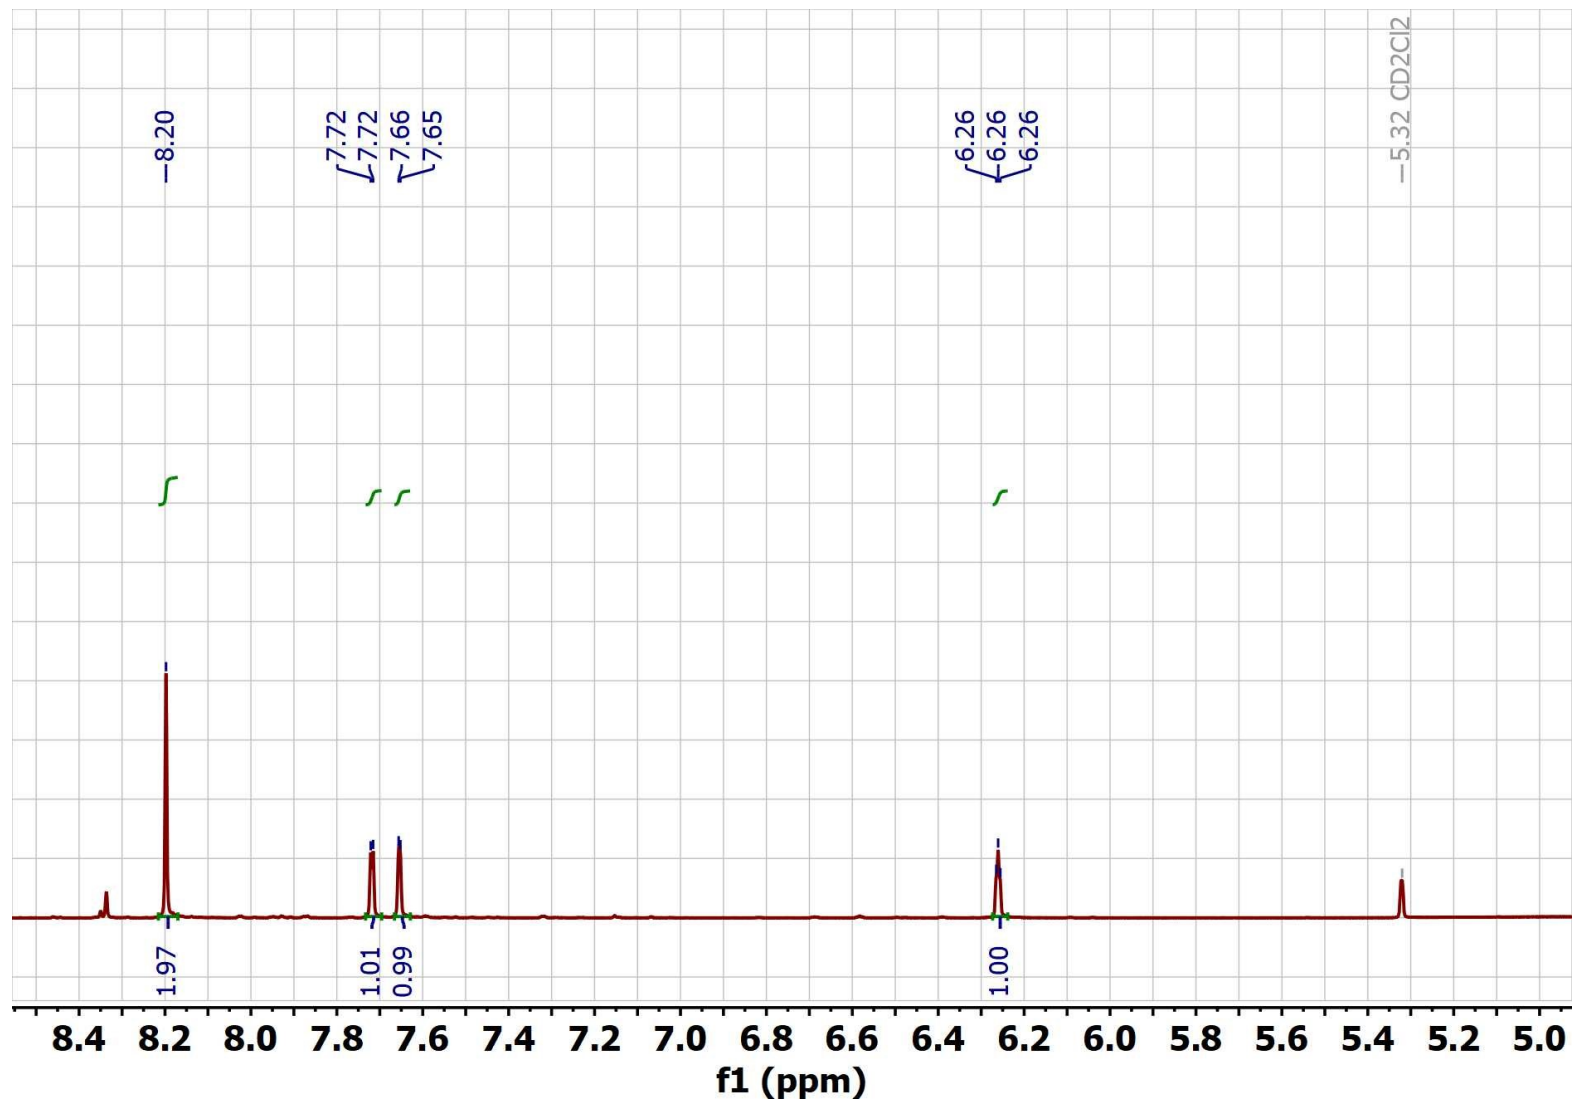

Figure S7:  $^{13}\text{C}$  NMR spectrum (aromatic region) of  $n\text{Bu}_4\text{NL}^2$  in  $\text{CD}_2\text{Cl}_2$ .

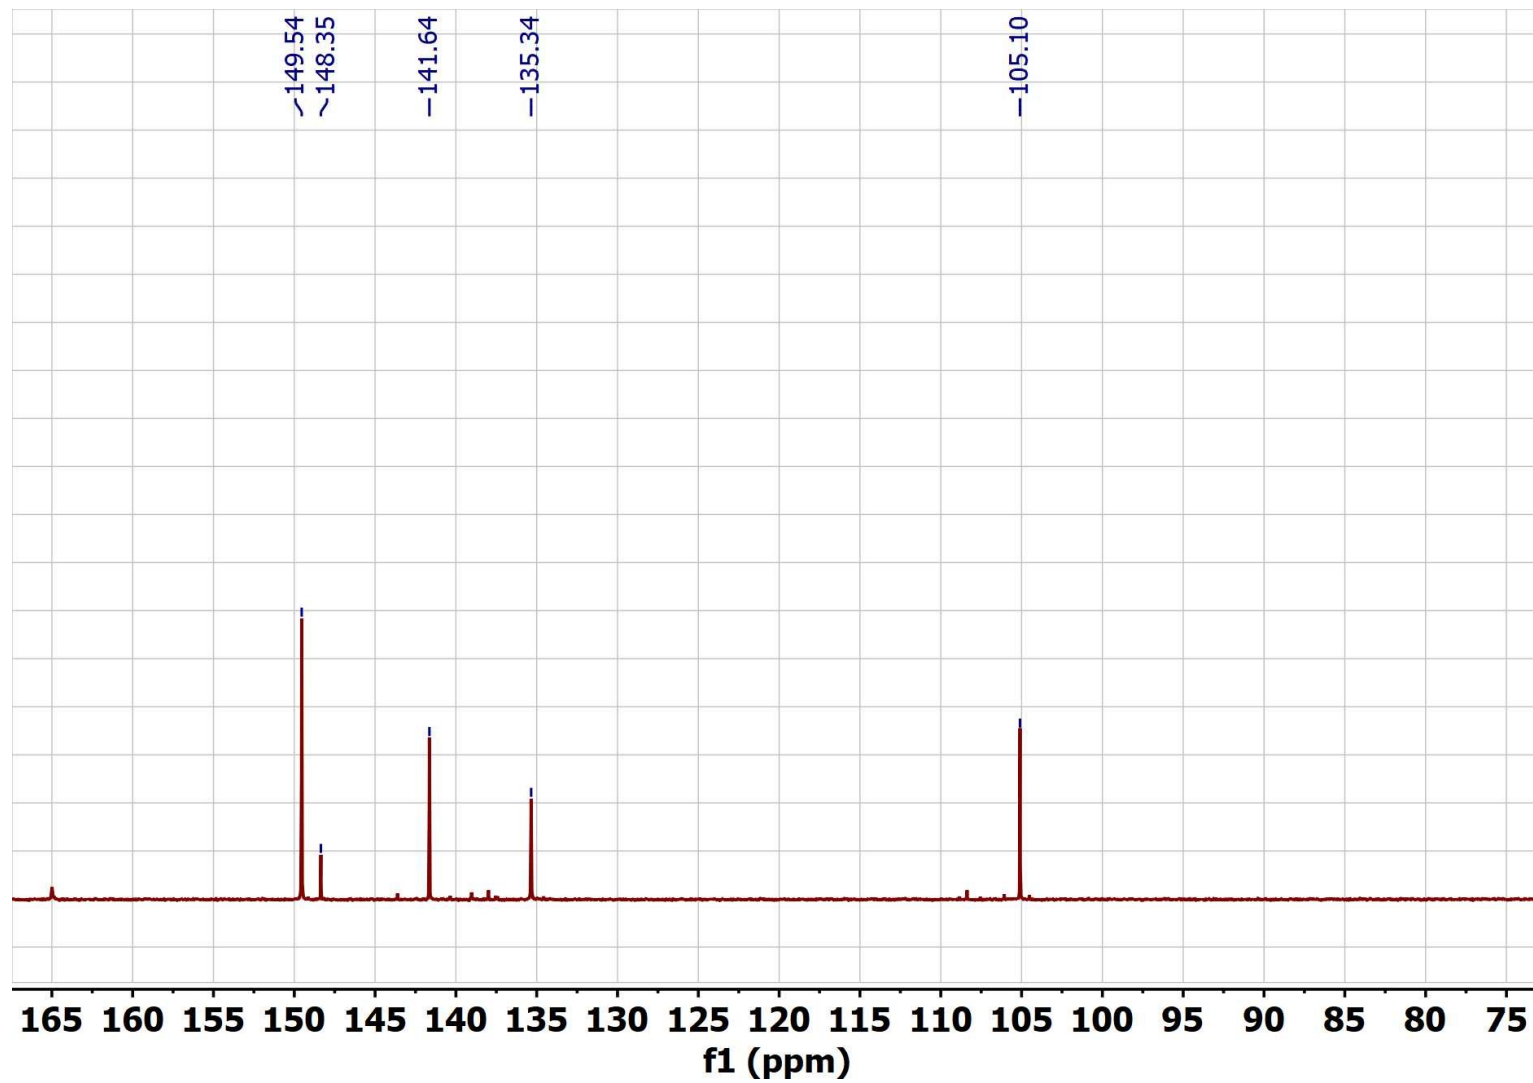



Figure S8:  $^{11}\text{B}$  NMR spectrum of  $n\text{Bu}_4\text{NL}^2$  in  $\text{CD}_2\text{Cl}_2$ .

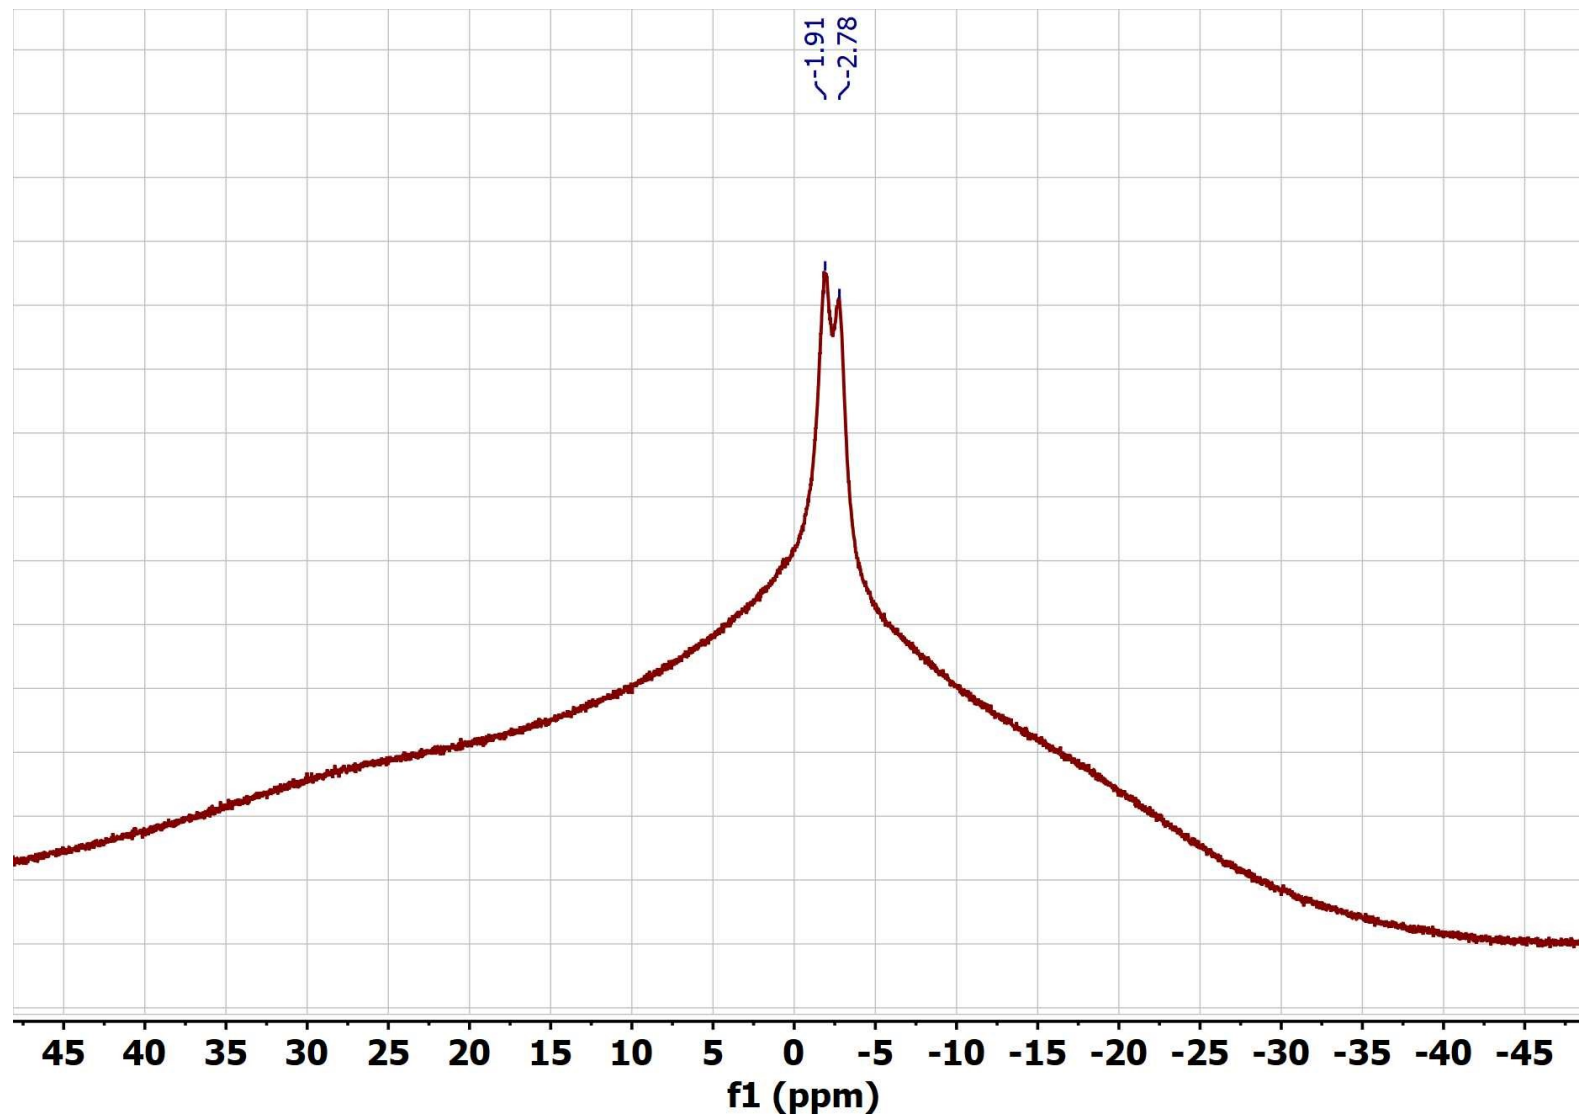

Figure S9:  $^1\text{H}$  NMR spectrum (aromatic region) of  ${}^n\text{Bu}_4\text{NL}^3$  in  $\text{CD}_2\text{Cl}_2$ .

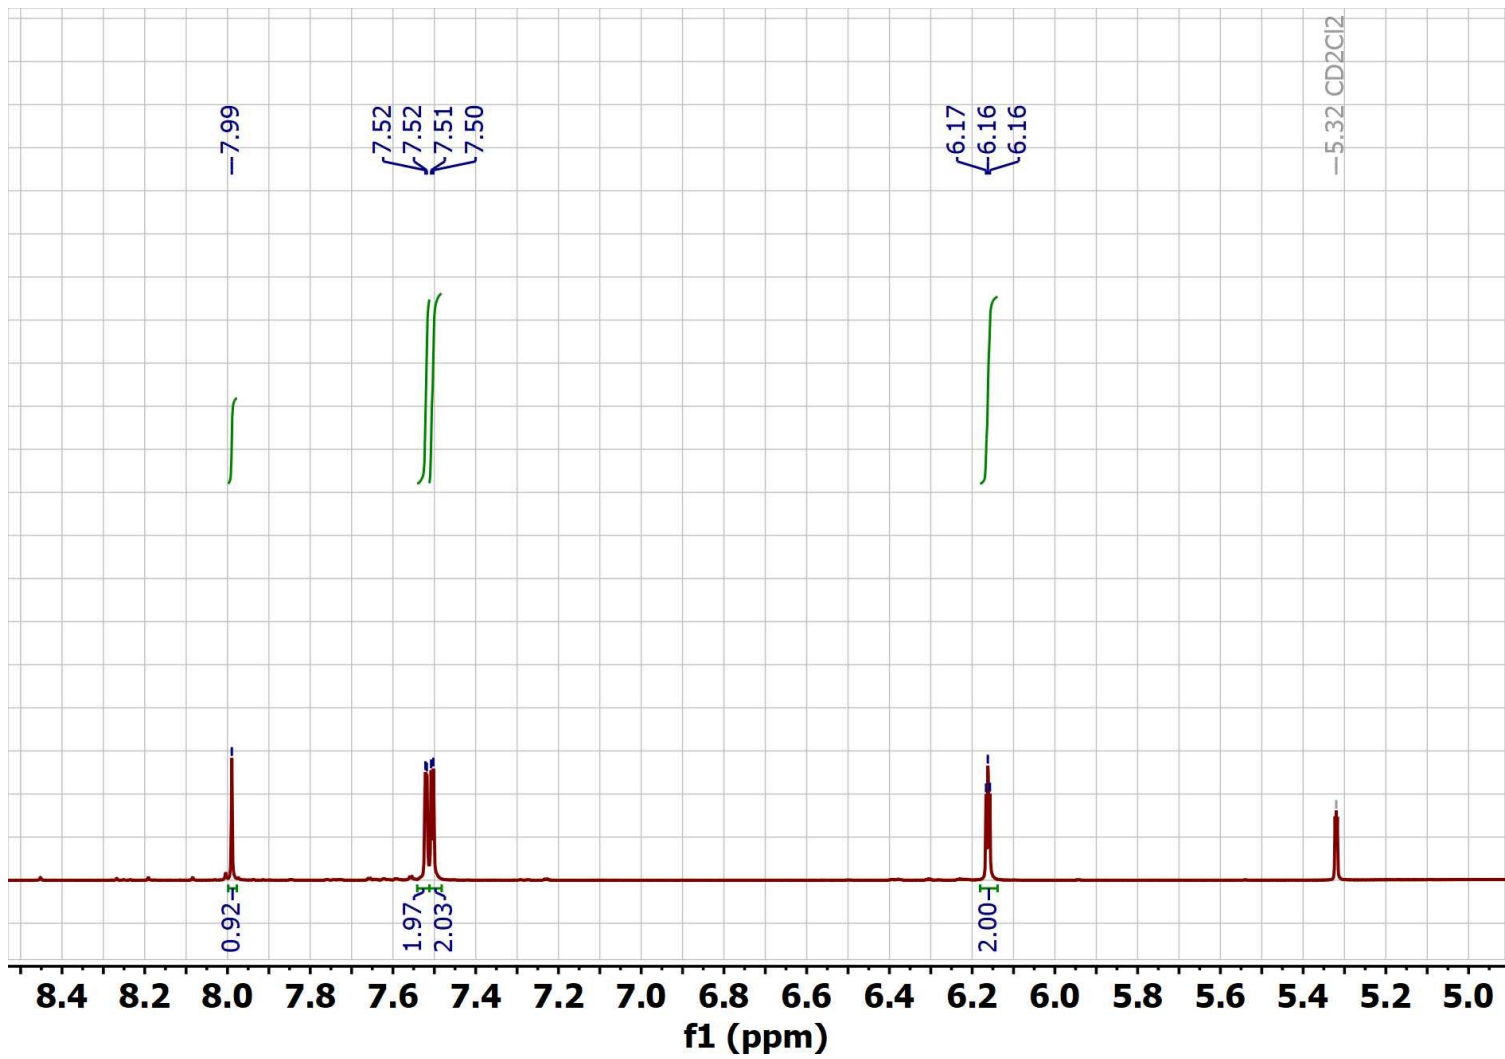

Figure S10:  $^{13}\text{C}$  NMR spectrum (aromatic region) of  $n\text{Bu}_4\text{NL}^3$  in  $\text{CD}_2\text{Cl}_2$ .

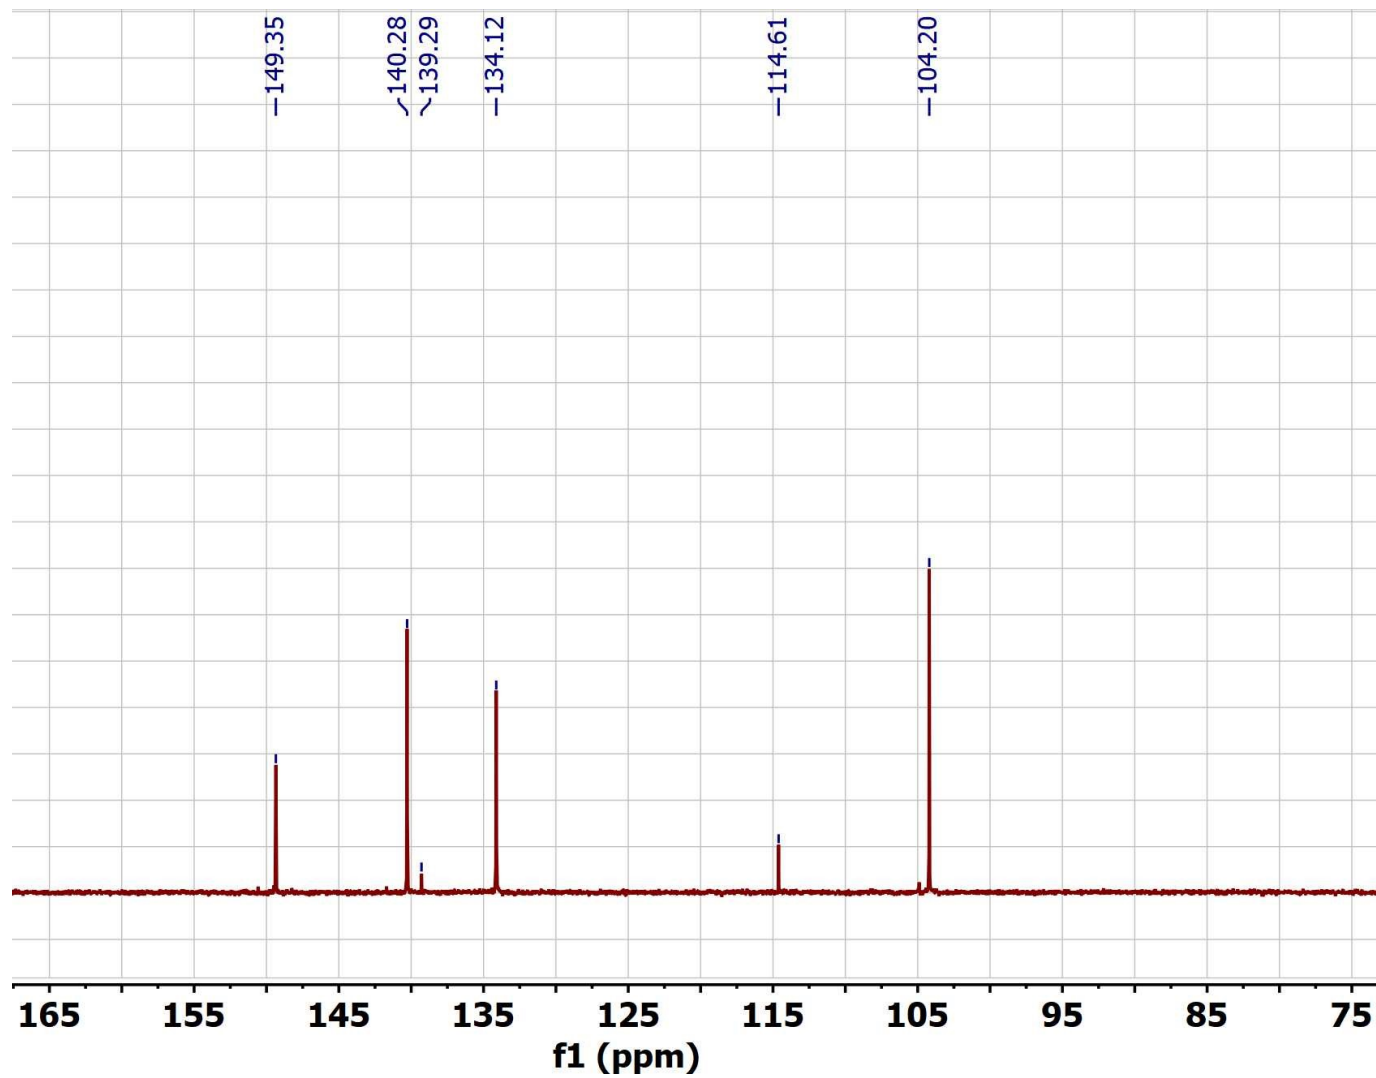

Figure S11:  $^{11}\text{B}$  NMR spectrum of  $n\text{Bu}_4\text{NL}^3$  in  $\text{CD}_2\text{Cl}_2$ .

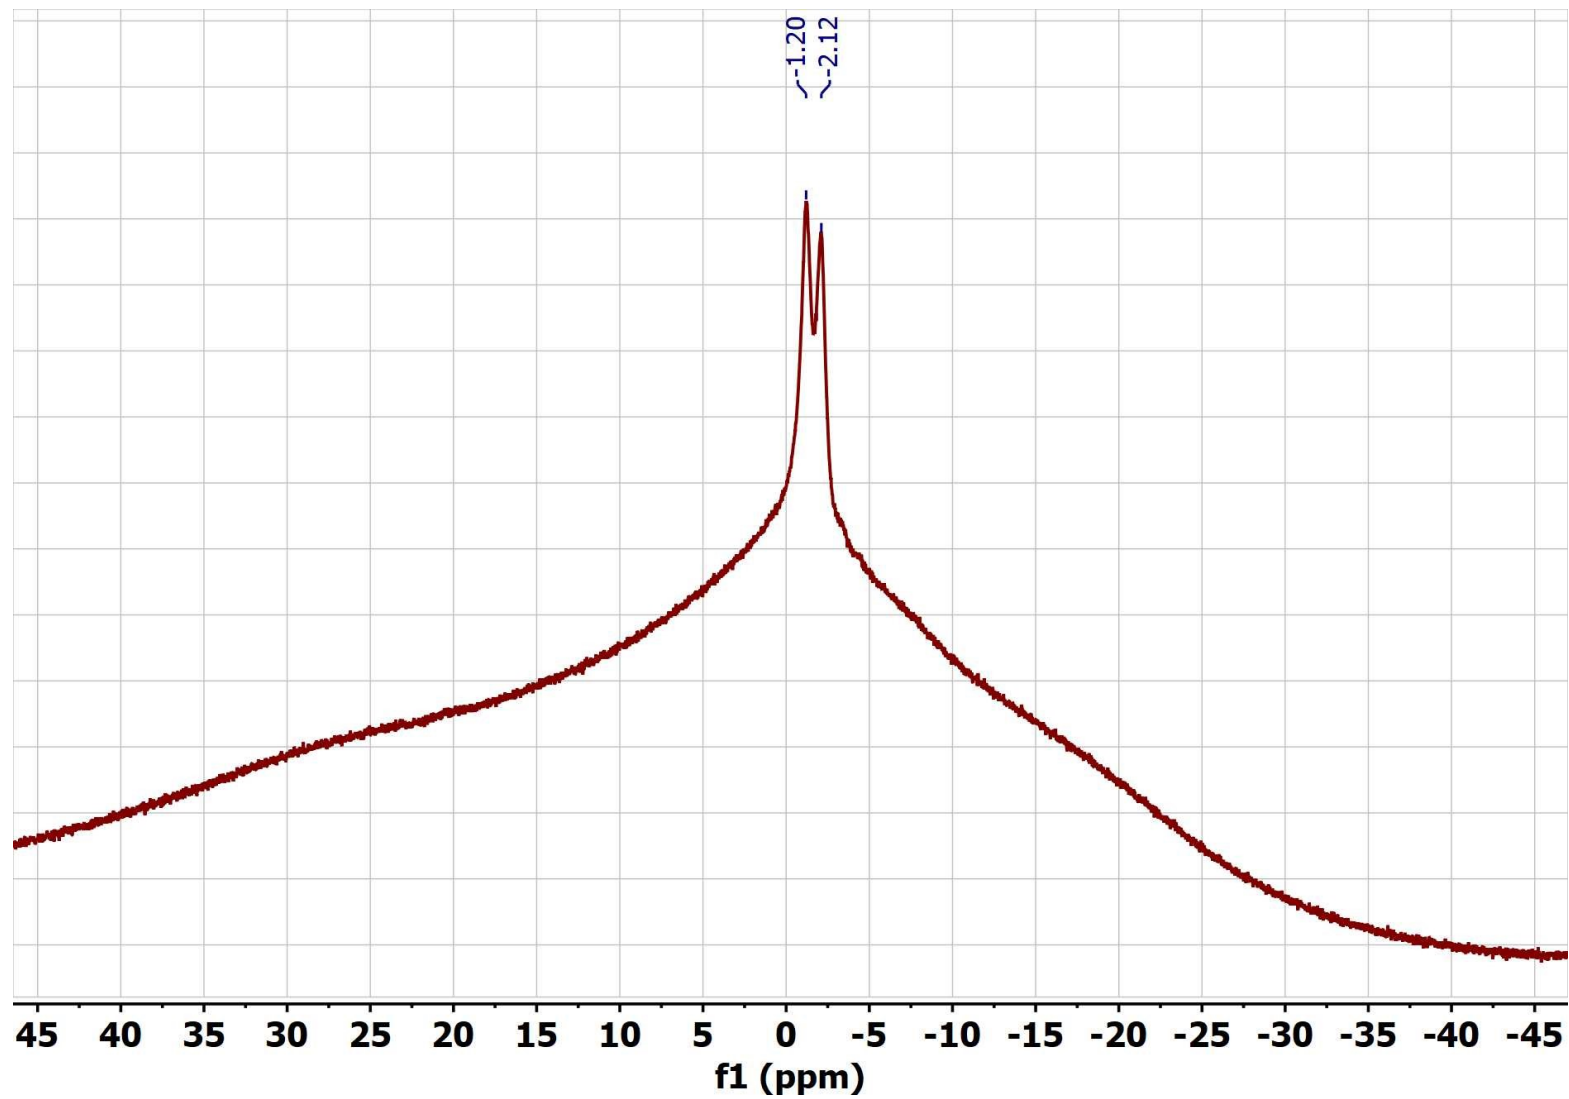

Figure S12:  $^1\text{H}$  NMR spectrum (aromatic region) of  ${}^n\text{Bu}_4\text{NL}^4$  in  $\text{CD}_2\text{Cl}_2$ .

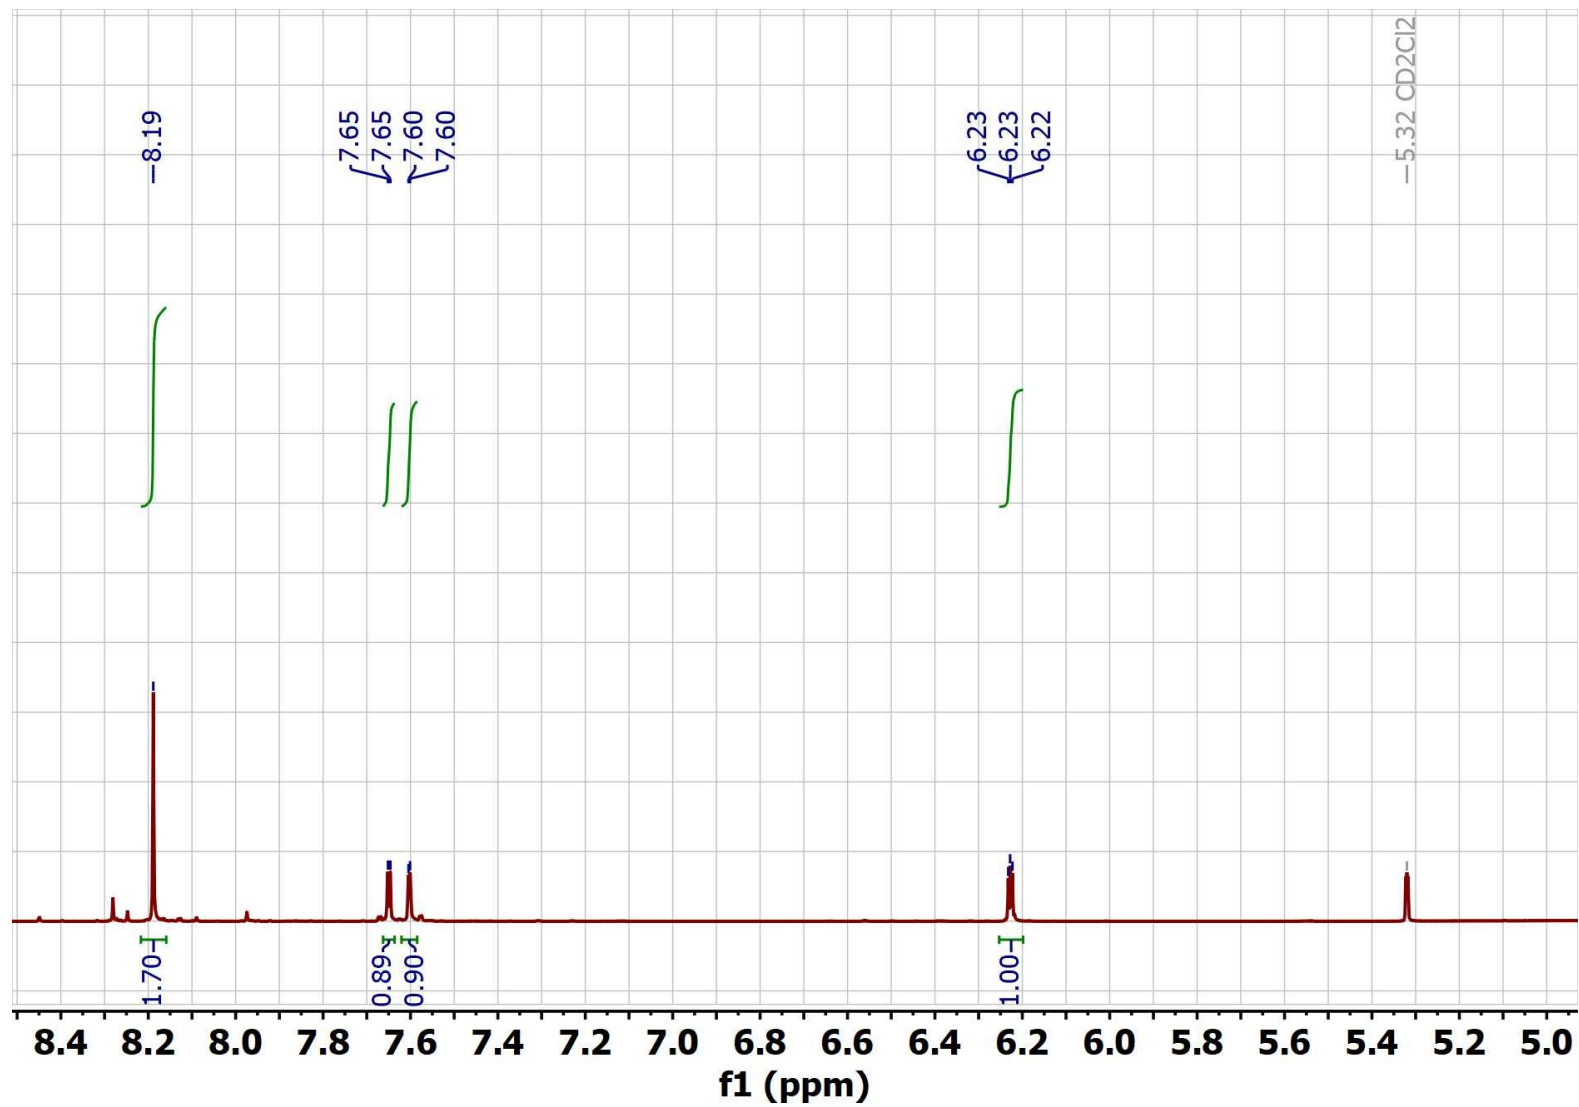

Figure S13:  $^{13}\text{C}$  NMR spectrum (aromatic region) of  $n\text{Bu}_4\text{NL}^4$  in  $\text{CD}_2\text{Cl}_2$ .

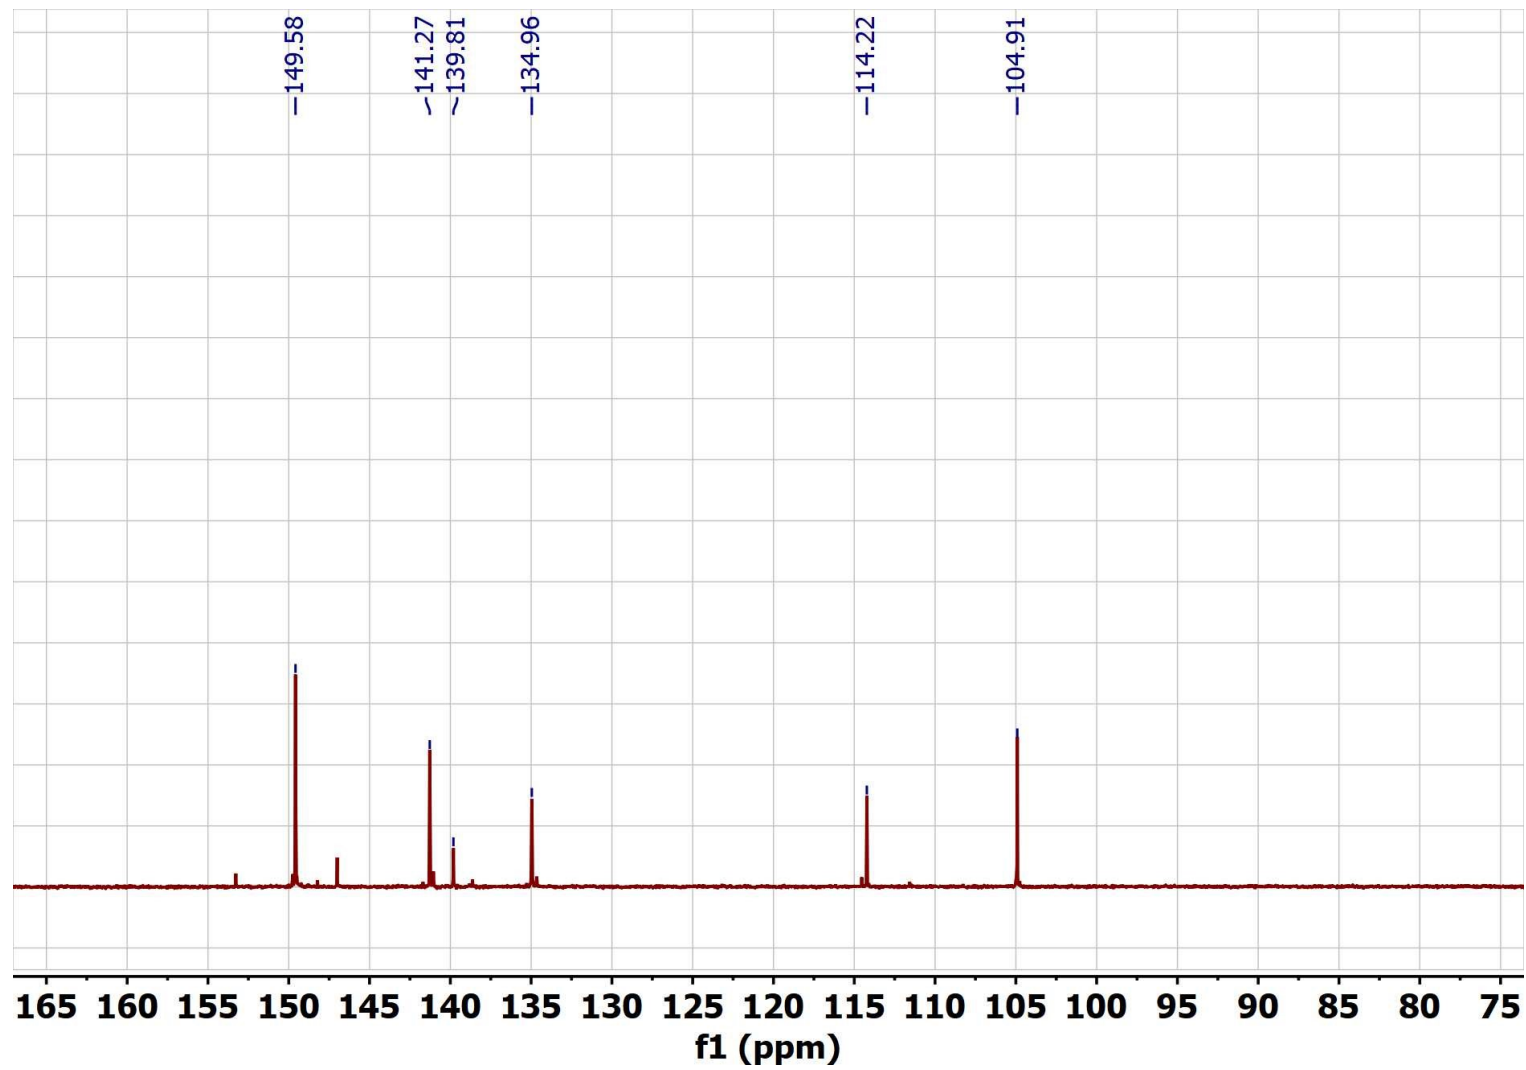

Figure S14:  $^{11}\text{B}$  NMR spectrum of  $n\text{Bu}_4\text{NL}^4$  in  $\text{CD}_2\text{Cl}_2$ .

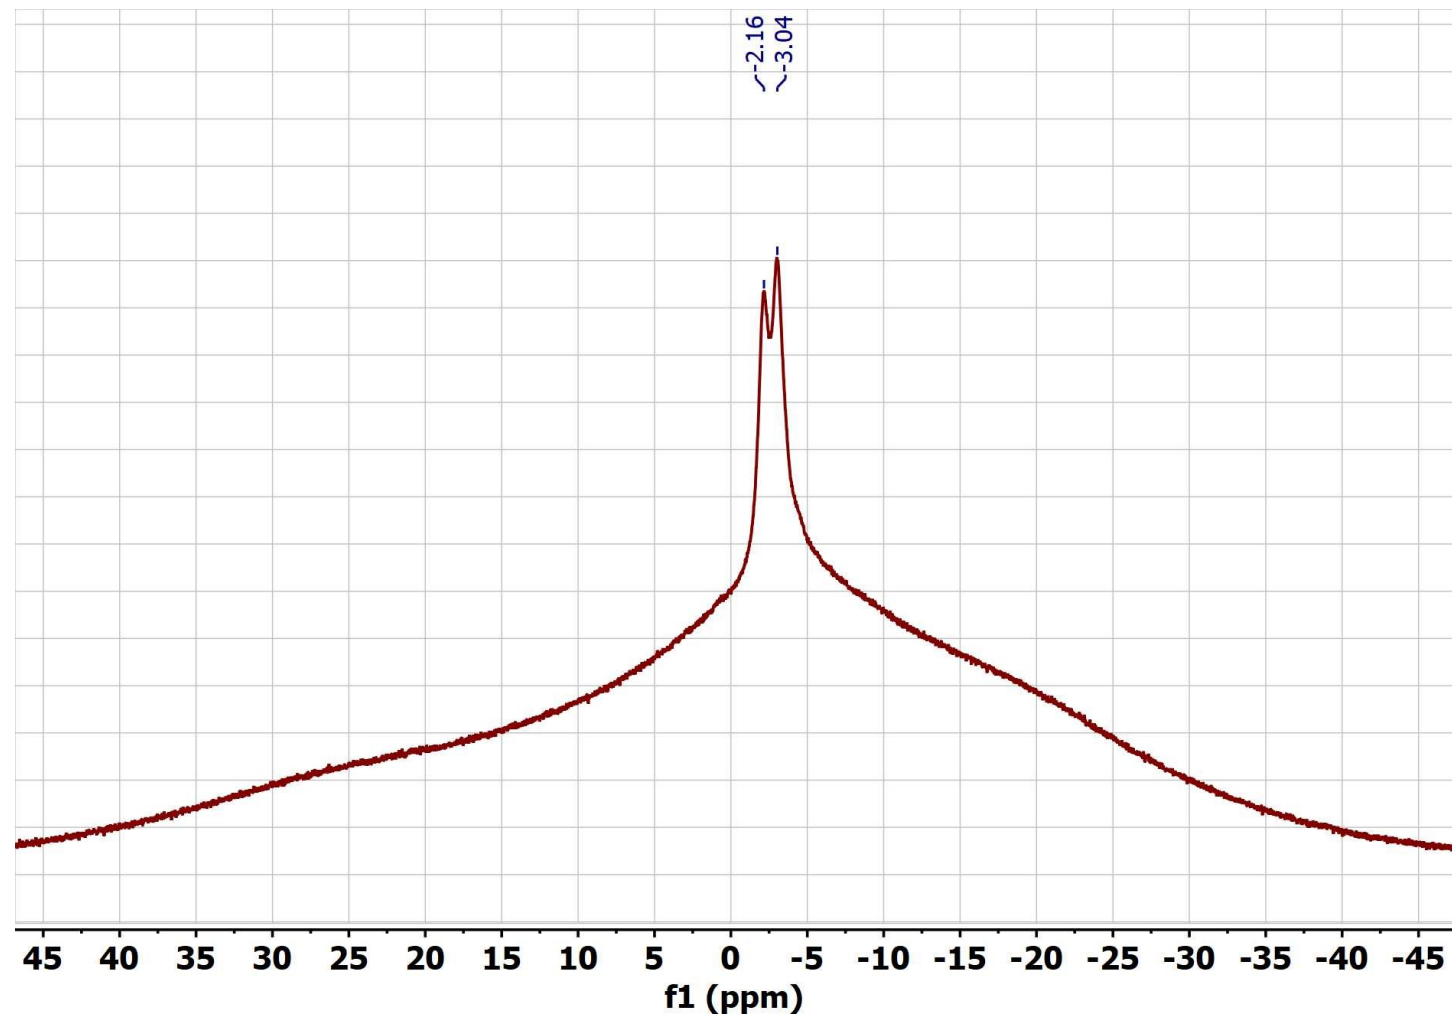

Figure S15: IR spectrum of  $n\text{Bu}_4\text{NL}^1$ .

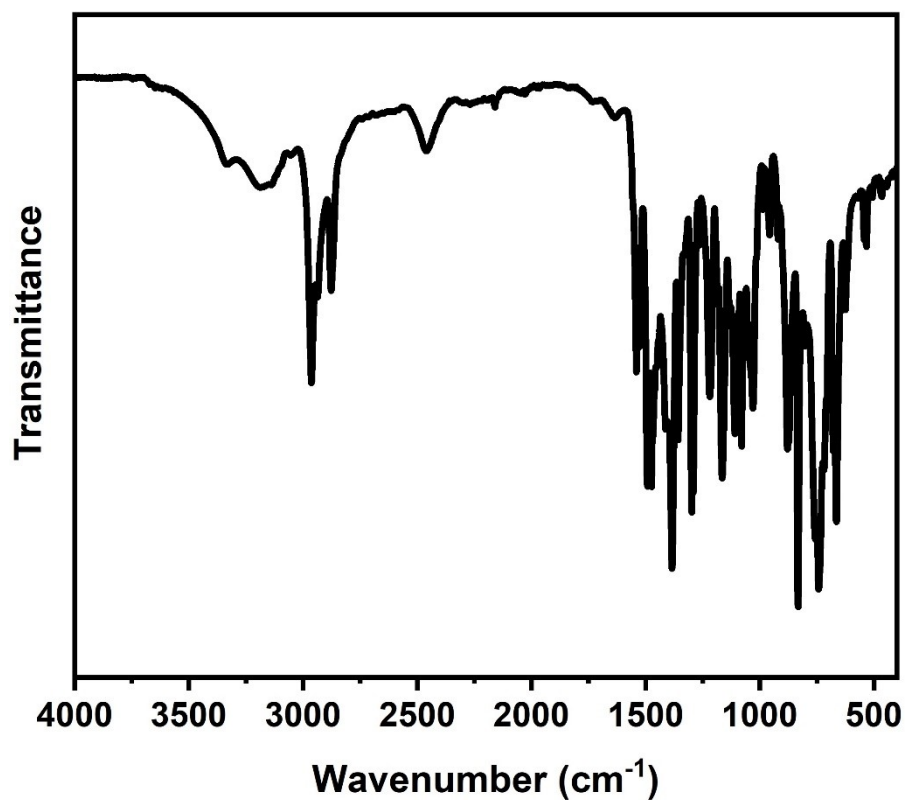

Figure S16: IR spectrum of  $n\text{Bu}_4\text{NL}^2$ .

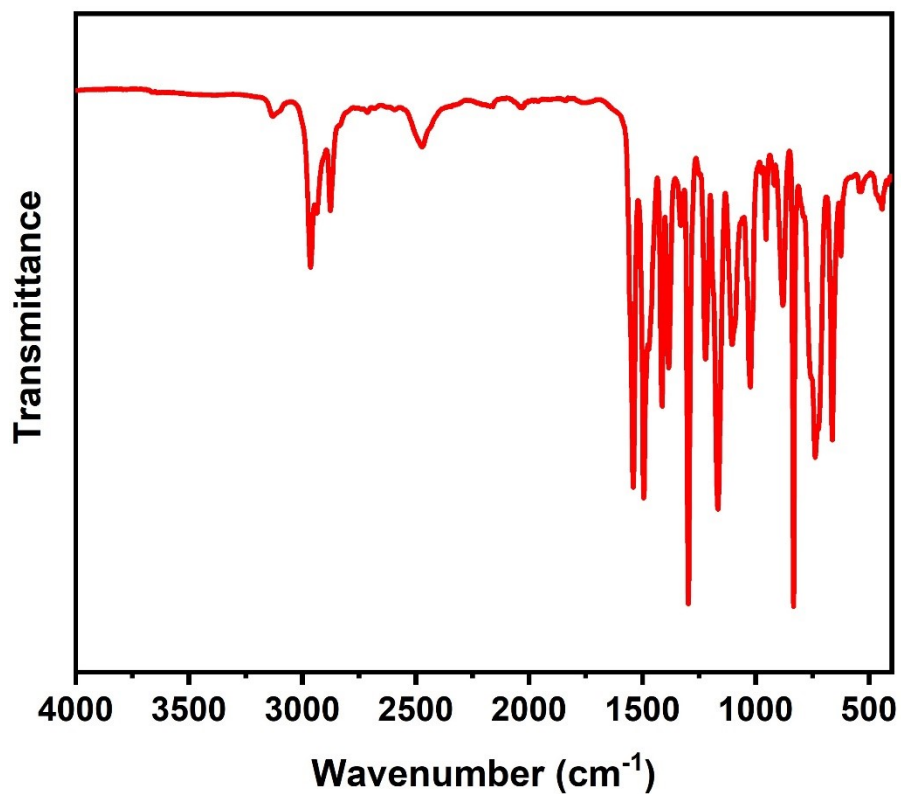



Figure S17: IR spectrum of  $n\text{Bu}_4\text{NL}^3$ .

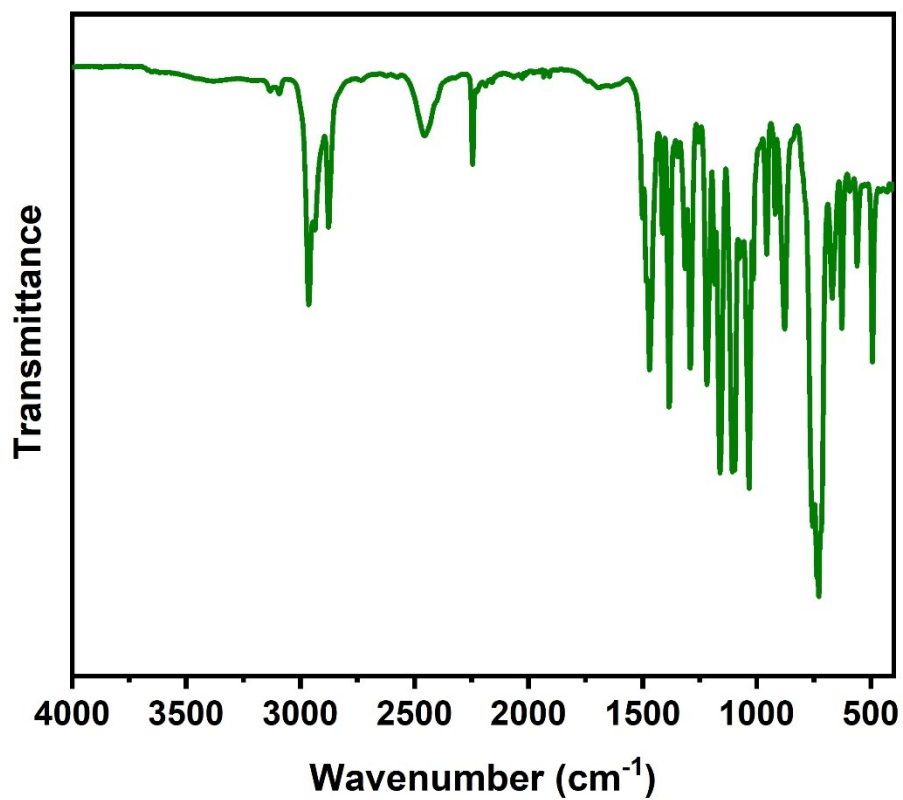

Figure S18: IR spectrum of  $n\text{Bu}_4\text{NL}^4$ .

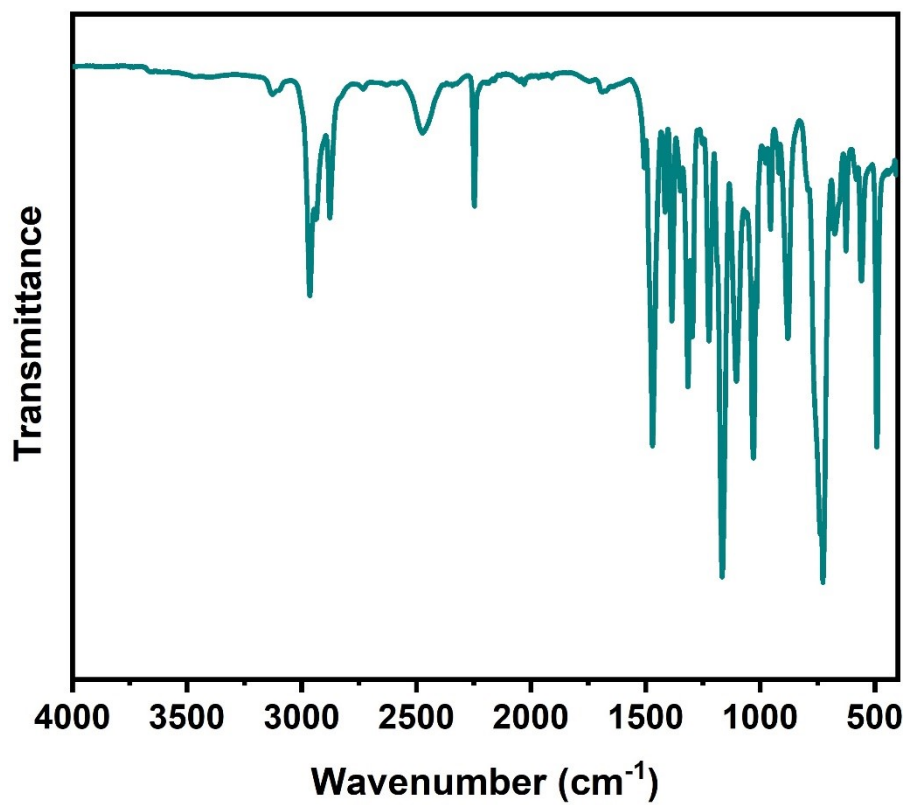

Figure S19: IR spectrum of complex 1.

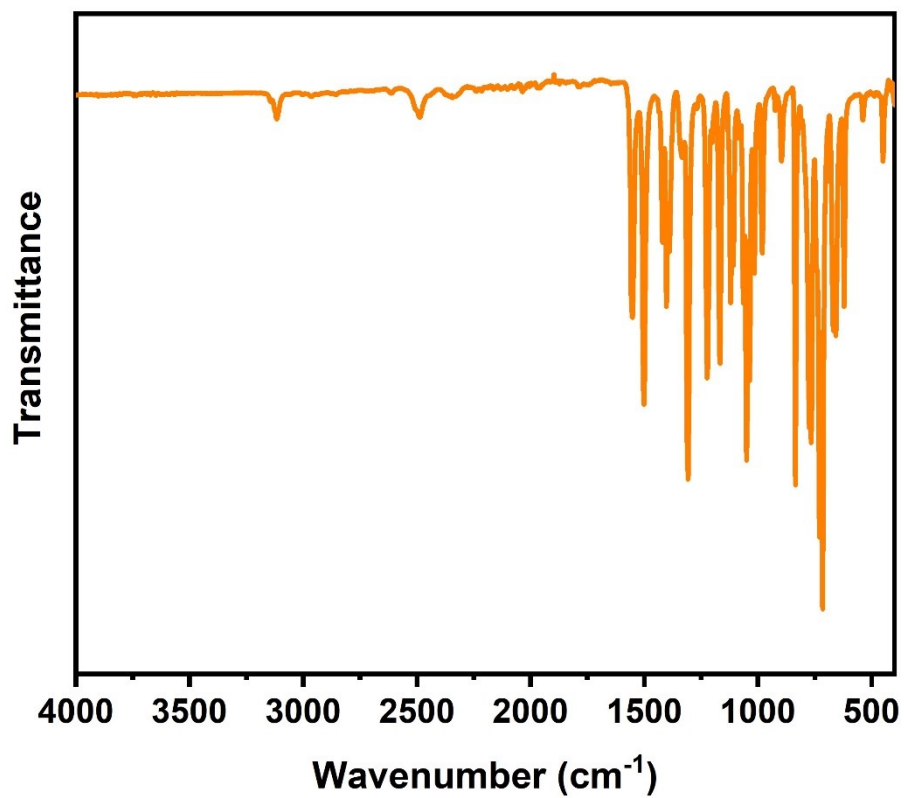

Figure S20: IR spectrum of complex 2.

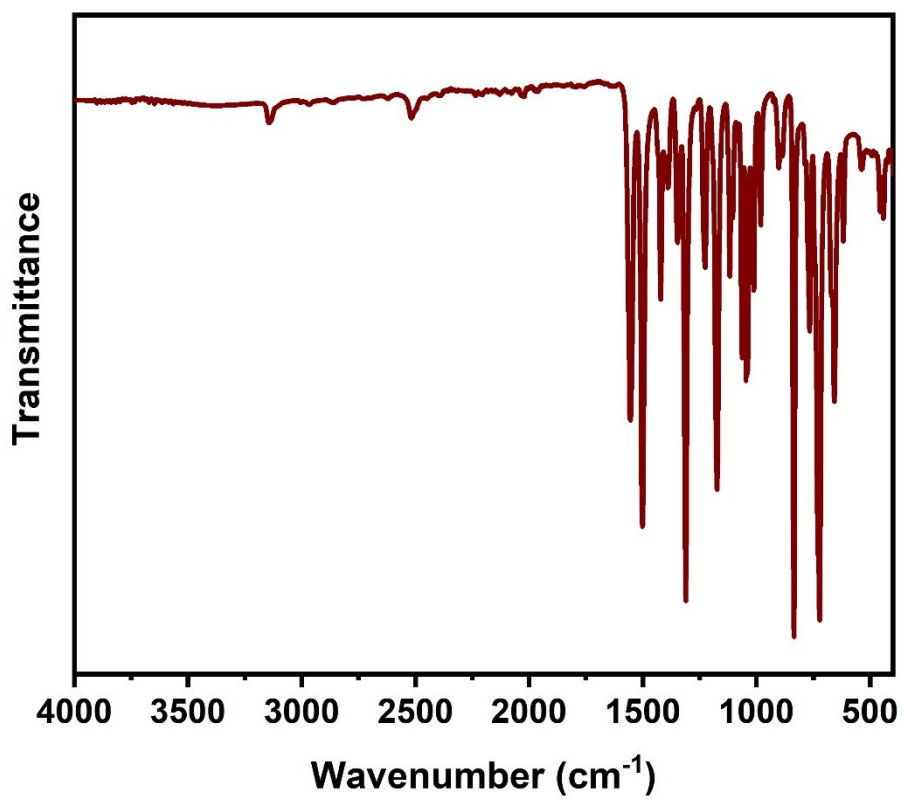

Figure S21: IR spectrum of complex 3.

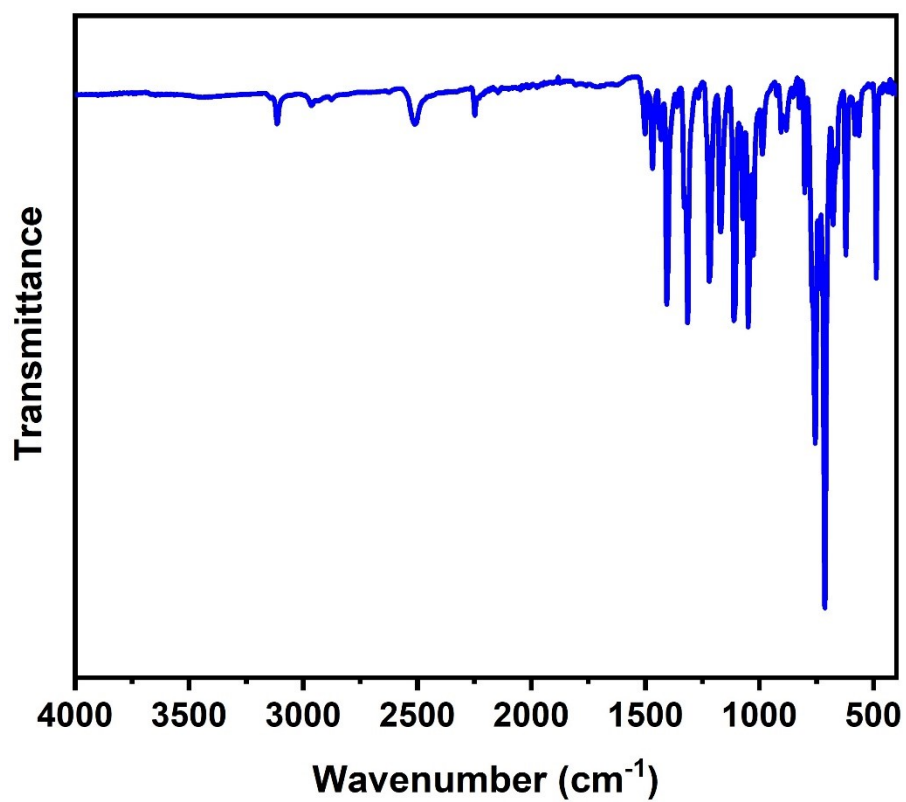

Figure S22: IR spectrum of complex 4.

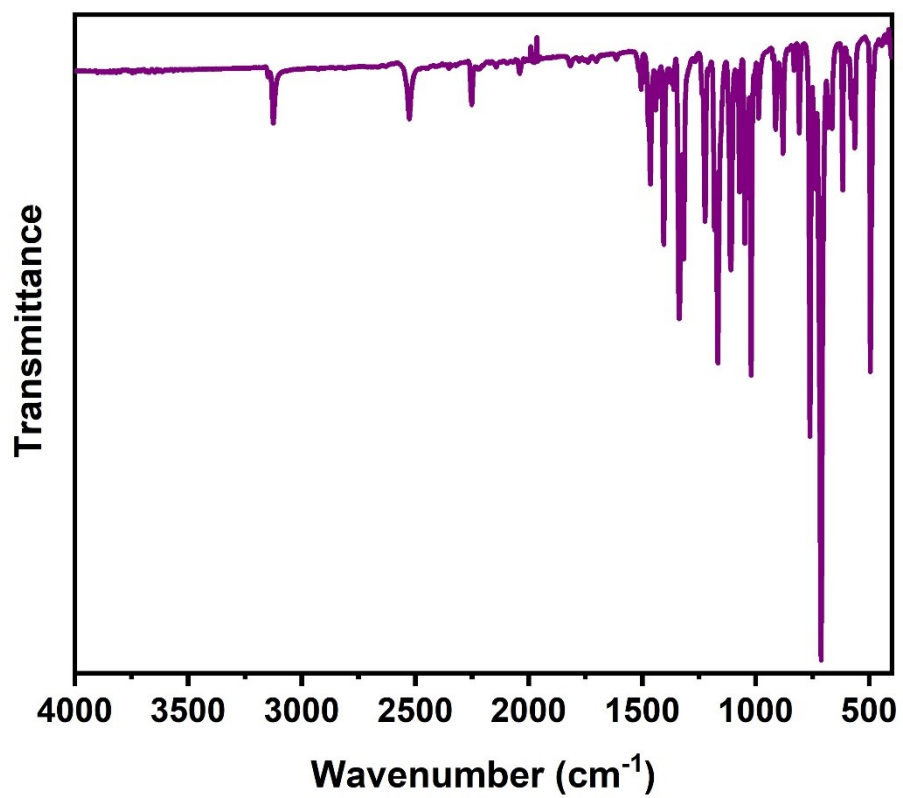

Figure S23: IR spectrum of complex 5.

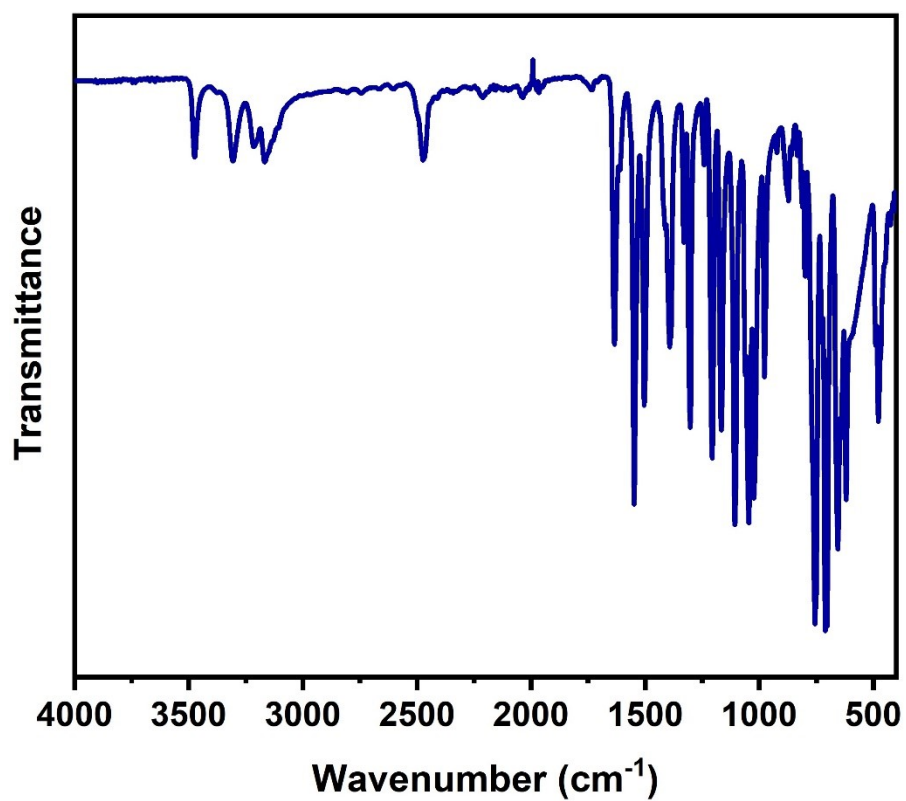

Figure S24: IR spectrum of complex 6.

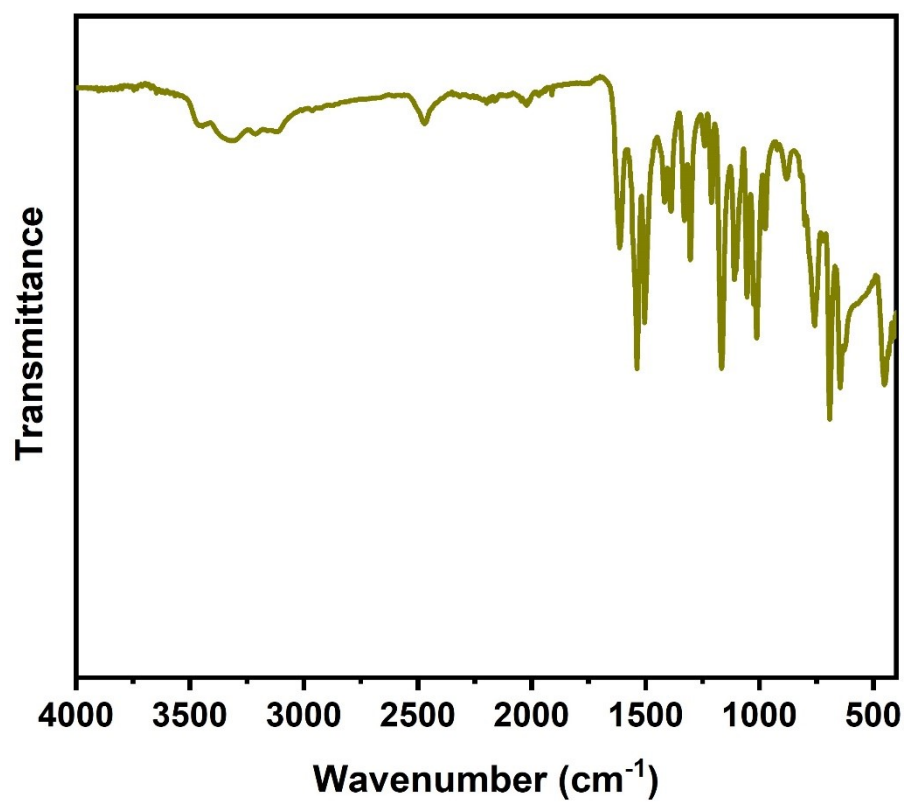

Table S1: Crystal data and structure refinement of **"Bu<sub>4</sub>NL<sup>1</sup>** and complexes **3** and **5** (at 100 K only).

| Compound                                                       | <b>"Bu<sub>4</sub>NL<sup>1</sup></b>                           | <b>3</b> ( <i>trans</i> )                                      | <b>3</b> ( <i>cis</i> )·CH <sub>2</sub> Cl <sub>2</sub>        | <b>5</b>                                                       |
|----------------------------------------------------------------|----------------------------------------------------------------|----------------------------------------------------------------|----------------------------------------------------------------|----------------------------------------------------------------|
| Formula weight                                                 | 501.49                                                         | 533.90                                                         | 618.84                                                         | 509.88                                                         |
| Temperature (K)                                                | 173                                                            | 100                                                            | 100                                                            | 100                                                            |
| Space group                                                    | <i>P2<sub>1</sub>/n</i>                                        | <i>C2/c</i>                                                    | <i>P2<sub>1</sub>/n</i>                                        | <i>P2<sub>1</sub>/n</i>                                        |
| <i>a</i> (Å)                                                   | 11.9642(1)                                                     | 9.6251(18)                                                     | 7.4188(2)                                                      | 10.364(3)                                                      |
| <i>b</i> (Å)                                                   | 15.7273(1)                                                     | 18.494(3)                                                      | 23.3314(7)                                                     | 16.490(4)                                                      |
| <i>c</i> (Å)                                                   | 15.0760(2)                                                     | 13.335(3)                                                      | 15.4739(3)                                                     | 12.598(3)                                                      |
| $\alpha$ , (°)                                                 | 90                                                             | 90                                                             | 90                                                             | 90                                                             |
| $\beta$ , (°)                                                  | 92.122(1)                                                      | 91.540(6)                                                      | 101.793(2)                                                     | 95.789(8)                                                      |
| $\gamma$ , (°)                                                 | 90                                                             | 90                                                             | 90                                                             | 90                                                             |
| Cell volume, (Å <sup>3</sup> )                                 | 2834.82(5)                                                     | 2372.9(8)                                                      | 2621.86(12)                                                    | 2142.1(10)                                                     |
| <i>Z</i>                                                       | 4                                                              | 4                                                              | 4                                                              | 4                                                              |
| $\rho_{\text{calc}}$ (g/cm <sup>3</sup> )                      | 1.175                                                          | 1.494                                                          | 1.568                                                          | 1.581                                                          |
| $\mu$ (mm <sup>-1</sup> )                                      | 0.62                                                           | 0.68                                                           | 6.87                                                           | 0.75                                                           |
| Reflections collected/unique                                   | 89937/5001                                                     | 34154/3978                                                     | 21400/4449                                                     | 58852/4388                                                     |
| GoF                                                            | 1.05                                                           | 0.85                                                           | 1.11                                                           | 0.99                                                           |
| Final <i>R</i> indices<br>[ <i>I</i> >2 $\sigma$ ( <i>I</i> )] | <i>R</i> <sub>1</sub> =0.041,<br><i>wR</i> <sub>2</sub> =0.117 | <i>R</i> <sub>1</sub> =0.037,<br><i>wR</i> <sub>2</sub> =0.121 | <i>R</i> <sub>1</sub> =0.076,<br><i>wR</i> <sub>2</sub> =0.214 | <i>R</i> <sub>1</sub> =0.037,<br><i>wR</i> <sub>2</sub> =0.101 |

Table S2: Selected geometric parameters for compound **3** (both *trans*- and *cis*-isomers) at 100 K.

| <b>Compound</b>                      |                     |                                                    |                     |
|--------------------------------------|---------------------|----------------------------------------------------|---------------------|
| <b>3 (<i>trans</i>)</b>              |                     | <b>3 (<i>cis</i>)·CH<sub>2</sub>Cl<sub>2</sub></b> |                     |
| <b>Fe—N</b>                          | <b>Distance (Å)</b> | <b>Fe—N</b>                                        | <b>Distance (Å)</b> |
| Fe1—N4 <sup>i</sup>                  | 1.9836(14)          | Fe1—N12                                            | 1.963(4)            |
| Fe1—N2 <sup>i</sup>                  | 1.9820(15)          | Fe1—N14                                            | 1.964(4)            |
| Fe1—N6 <sup>i</sup>                  | 1.9618(14)          | Fe1—N6                                             | 1.969(4)            |
| Fe1—N6                               | 1.9618(14)          | Fe1—N4                                             | 1.971(4)            |
| Fe1—N2                               | 1.9820(15)          | Fe1—N2                                             | 1.972(5)            |
| Fe1—N4                               | 1.9836(14)          | Fe1—N10                                            | 1.973(4)            |
| <b>N—Fe—N</b>                        | <b>Angle (°)</b>    | <b>N—Fe—N</b>                                      | <b>Angle (°)</b>    |
| N4 <sup>i</sup> —Fe1—N2 <sup>i</sup> | 89.24(6)            | N6—Fe1—N10                                         | 90.35(17)           |
| N4 <sup>i</sup> —Fe1—N6              | 91.96(6)            | N4—Fe1—N10                                         | 179.03(18)          |
| N2 <sup>i</sup> —Fe1—N6              | 92.21(6)            | N2—Fe1—N10                                         | 91.04(17)           |
| N4 <sup>i</sup> —Fe1—N6 <sup>i</sup> | 88.04(6)            | N12—Fe1—N14                                        | 87.87(18)           |
| N2 <sup>i</sup> —Fe1—N6 <sup>i</sup> | 87.79(6)            | N12—Fe1—N6                                         | 177.69(17)          |
| N6 <sup>i</sup> —Fe1—N6              | 179.99              | N14—Fe1—N6                                         | 90.50(18)           |
| N4 <sup>i</sup> —Fe1—N2              | 90.76(6)            | N12—Fe1—N4                                         | 91.58(17)           |
| N2 <sup>i</sup> —Fe1—N2              | 179.99              | N14—Fe1—N4                                         | 90.74(17)           |
| N6—Fe1—N2                            | 87.79(6)            | N6—Fe1—N4                                          | 90.08(17)           |
| N6 <sup>i</sup> —Fe1—N2              | 92.21(6)            | N12—Fe1—N2                                         | 93.67(19)           |
| N4 <sup>i</sup> —Fe1—N4              | 179.99              | N14—Fe1—N2                                         | 178.10(17)          |
| N2 <sup>i</sup> —Fe1—N4              | 90.76(6)            | N6—Fe1—N2                                          | 88.00(18)           |
| N6—Fe1—N4                            | 88.04(6)            | N4—Fe1—N2                                          | 88.10(17)           |
| N6 <sup>i</sup> —Fe1—N4              | 91.96(6)            | N12—Fe1—N10                                        | 88.02(17)           |
| N2—Fe1—N4                            | 89.24(6)            | N14—Fe1—N10                                        | 90.13(17)           |

Table S3: Unit cell parameters of **5** at selected temperatures.

| Parameter                      | Temperature (K) |            |            |             |
|--------------------------------|-----------------|------------|------------|-------------|
|                                | 100             | 293        | 320        | 393         |
| <i>a</i> (Å)                   | 10.364(3)       | 10.547(3)  | 10.5951(7) | 10.6457(2)  |
| <i>b</i> (Å)                   | 16.490(4)       | 16.596(4)  | 16.5995(9) | 16.6839(5)  |
| <i>c</i> (Å)                   | 12.598(3)       | 12.943(4)  | 12.9503(8) | 13.0720(3)  |
| $\beta$ , (°)                  | 95.789(8)       | 95.213(10) | 94.867(6)  | 94.662(2)   |
| Cell volume, (Å <sup>3</sup> ) | 2142.1(10)      | 2256.1(11) | 2269.4(2)  | 2314.06(10) |

Table S4: Selected structural parameters for **5** at selected temperatures.

|              | Temperature (K) |           |            |            |
|--------------|-----------------|-----------|------------|------------|
|              | 100             | 293       | 320        | 393        |
| Distance (Å) |                 |           |            |            |
| Fe1—N6       | 1.9797(19)      | 2.080(2)  | 2.103(3)   | 2.1268(18) |
| Fe1—N14      | 1.9772(19)      | 2.082(2)  | 2.105(3)   | 2.1315(19) |
| Fe1—N10      | 1.988(2)        | 2.117(2)  | 2.130(3)   | 2.165(2)   |
| Fe1—N2       | 1.986(2)        | 2.107(3)  | 2.132(3)   | 2.1668(19) |
| Fe1—N4       | 1.995(2)        | 2.134(2)  | 2.154(3)   | 2.178(2)   |
| Fe1—N12      | 1.999(2)        | 2.120(3)  | 2.153(3)   | 2.1868(19) |
| Angle (°)    |                 |           |            |            |
| N6—Fe1—N14   | 179.13(8)       | 179.37(9) | 179.11(12) | 178.85(8)  |
| N6—Fe1—N10   | 91.79(8)        | 94.01(9)  | 94.52(12)  | 94.98(7)   |
| N14—Fe1—N10  | 87.90(8)        | 86.61(9)  | 86.35(12)  | 86.08(8)   |
| N6—Fe1—N2    | 87.83(8)        | 86.23(9)  | 85.88(12)  | 85.42(8)   |
| N14—Fe1—N2   | 91.36(8)        | 93.80(9)  | 94.30(12)  | 95.02(8)   |
| N10—Fe1—N2   | 89.70(8)        | 91.33(9)  | 91.61(12)  | 92.12(8)   |
| N6—Fe1—N4    | 89.27(8)        | 87.47(9)  | 87.14(11)  | 86.84(7)   |
| N14—Fe1—N4   | 91.01(8)        | 91.91(9)  | 92.00(12)  | 92.13(8)   |
| N10—Fe1—N4   | 178.00(8)       | 177.29(9) | 177.09(12) | 177.10(8)  |
| N2—Fe1—N4    | 88.65(8)        | 86.50(9)  | 86.13(12)  | 85.76(8)   |
| N6—Fe1—N12   | 91.71(8)        | 92.57(9)  | 92.74(11)  | 93.07(7)   |
| N14—Fe1—N12  | 89.09(8)        | 87.42(9)  | 87.11(12)  | 86.54(8)   |
| N10—Fe1—N12  | 88.83(8)        | 86.67(9)  | 86.03(12)  | 85.66(8)   |
| N2—Fe1—N12   | 178.44(8)       | 177.59(9) | 177.17(12) | 177.20(8)  |
| N4—Fe1—N12   | 92.83(8)        | 95.54(9)  | 96.28(12)  | 96.51(8)   |

Figure S25. Simulated powder pattern from the respective single crystal XRD data (dark grey line) and experimental PXRD pattern (red line) of **5**.

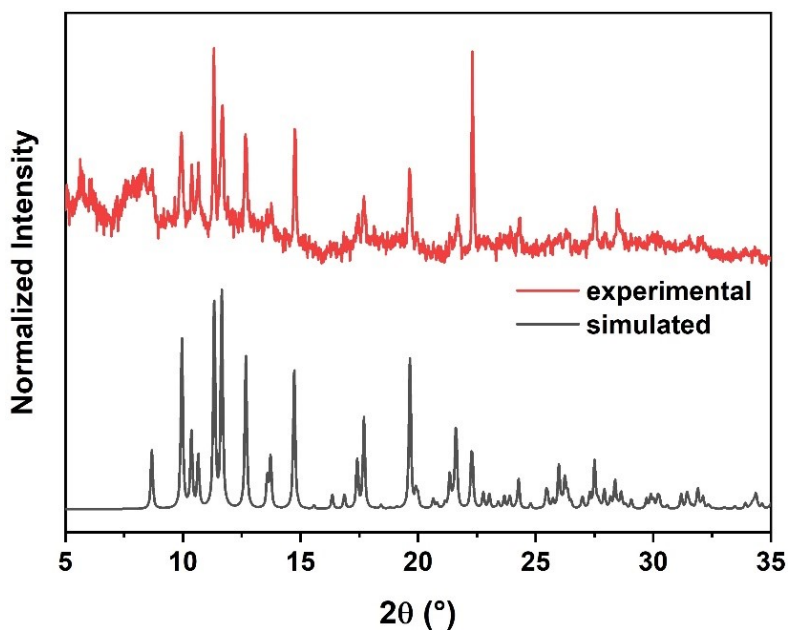

Figure S26. Simulated powder XRD patterns for the *cis*- and *trans*-isomer of **3** and the experimental pattern for the bulk powder of the compound acquired at room temperature.

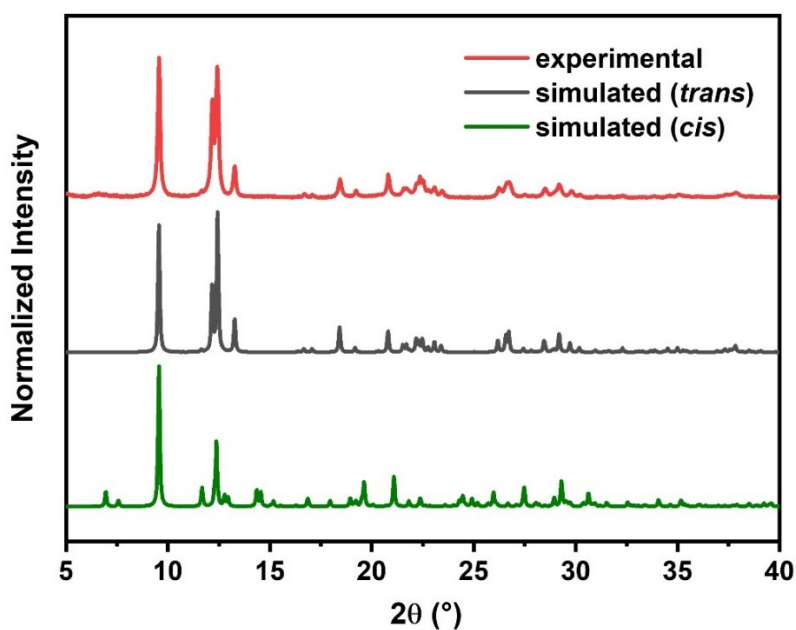



Figure S27: Thermal variation of molar magnetic susceptibility of **5** over three consecutive heating/cooling cycles

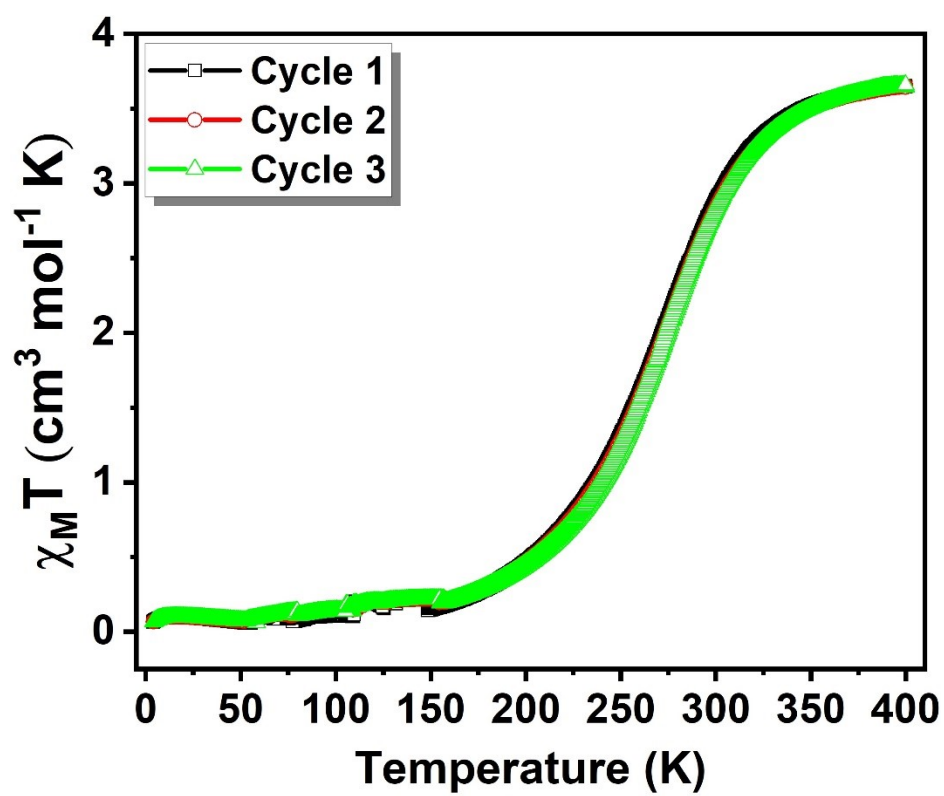

Figure S28. Mössbauer spectra recorded for the bulk powder of **5** at selected temperatures.

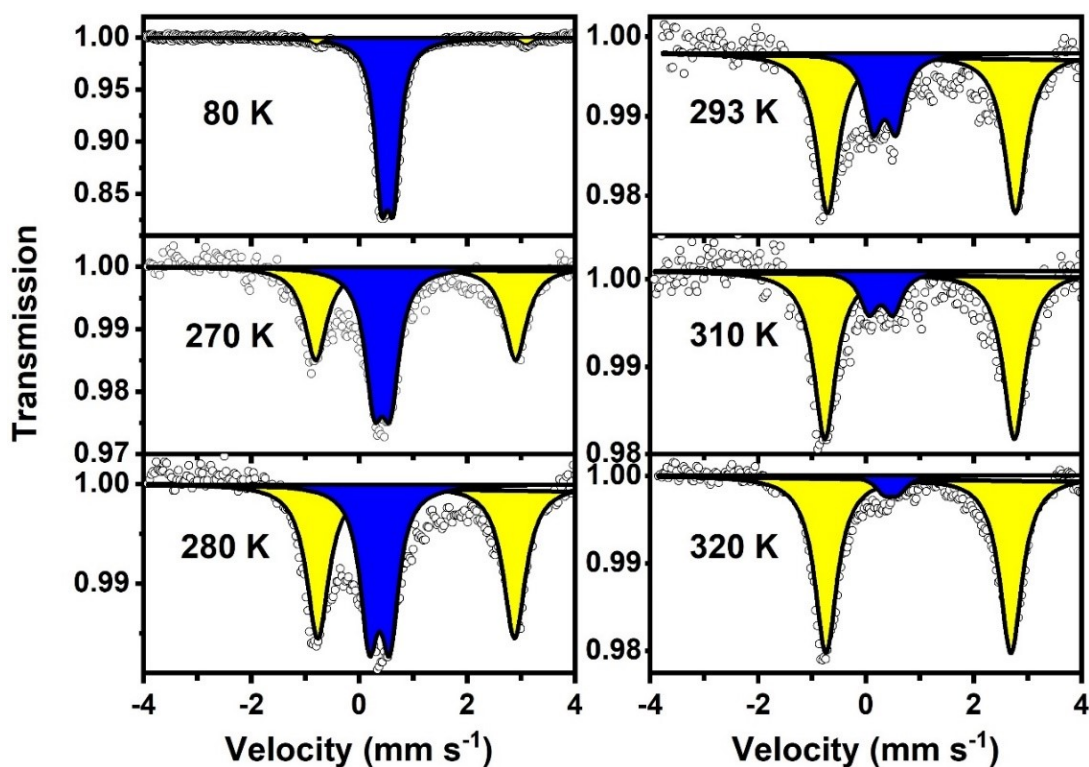

Table S5. Selected parameters determined from the Mössbauer spectra of **5** at selected temperatures. Values in brackets stand for the standard deviation. Fixed values are underlined.

| $T$<br>(K) | $\delta^{HS}/\delta^{LS}$<br>( $\text{mm}\cdot\text{s}^{-1}$ ) | $\Delta E q^{HS}/\Delta E q^{LS}$<br>( $\text{mm}\cdot\text{s}^{-1}$ ) | $\text{HWHM}^{HS}/\text{HWHM}^{LS}$<br>( $\text{mm}\cdot\text{s}^{-1}$ ) | Acquisition time,<br>(d) | $\gamma_{HS}$<br>(%) |
|------------|----------------------------------------------------------------|------------------------------------------------------------------------|--------------------------------------------------------------------------|--------------------------|----------------------|
| <b>80</b>  | 1.15(2)/0.525(1)                                               | 3.89(5)/0.226(2)                                                       | 0.13(4)/0.146(2)                                                         | 3                        | 4.0(9)               |
| <b>270</b> | 1.05(2)/0.43(1)                                                | 3.70(3)/0.30(2)                                                        | <u>0.25/0.2</u>                                                          | 2                        | 50(3)                |
| <b>280</b> | 1.057(8)/0.378(9)                                              | 3.65(2)/0.38(2)                                                        | <u>0.25/0.2</u>                                                          | 5                        | 58(2)                |
| <b>293</b> | 1.03(1)/ <u>0.35</u>                                           | 3.48(2)/0.42(5)                                                        | <u>0.25/0.2</u>                                                          | 3                        | 74(3)                |
| <b>310</b> | 1.00(2)/0.28(8)                                                | 3.51(4)/0.45                                                           | <u>0.25/0.2</u>                                                          | 5                        | 84(5)                |
| <b>320</b> | 0.975(5)/ <u>0.47</u>                                          | 3.43(1)/ <u>0.25</u>                                                   | <u>0.25/0.2</u>                                                          | 7                        | 94(2)                |

Figure S29. Correlation of molar magnetic susceptibility thermal variation for **5** (black symbols) and  $\gamma_{\text{HS}}$  (red symbols with error bars) extracted from the Mössbauer spectra of the complex acquired at six different temperatures.

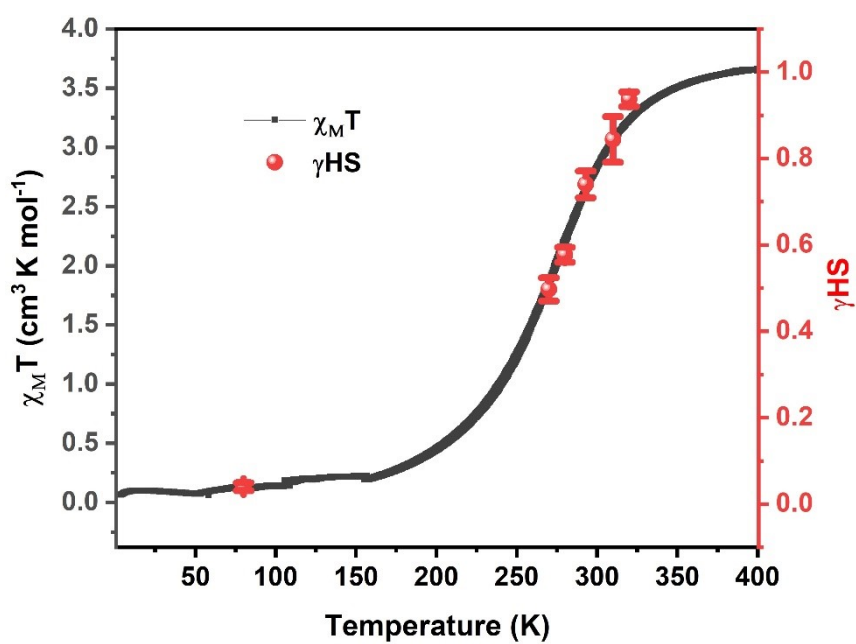

Supplement: d4dt02244k1.pdf [file d4dt02244k1.pdf]
